# Supplementary material for: A new, low impact and efficient synthesis of ω-nitro esters under solid heterogeneous catalysis
Source: Royal Society of Chemistry journal article supplement (doi:10.1039/c7gc02241g), 2017-01-01

<sup>1</sup>H-NMR of compound **2a**

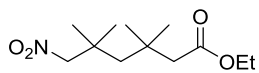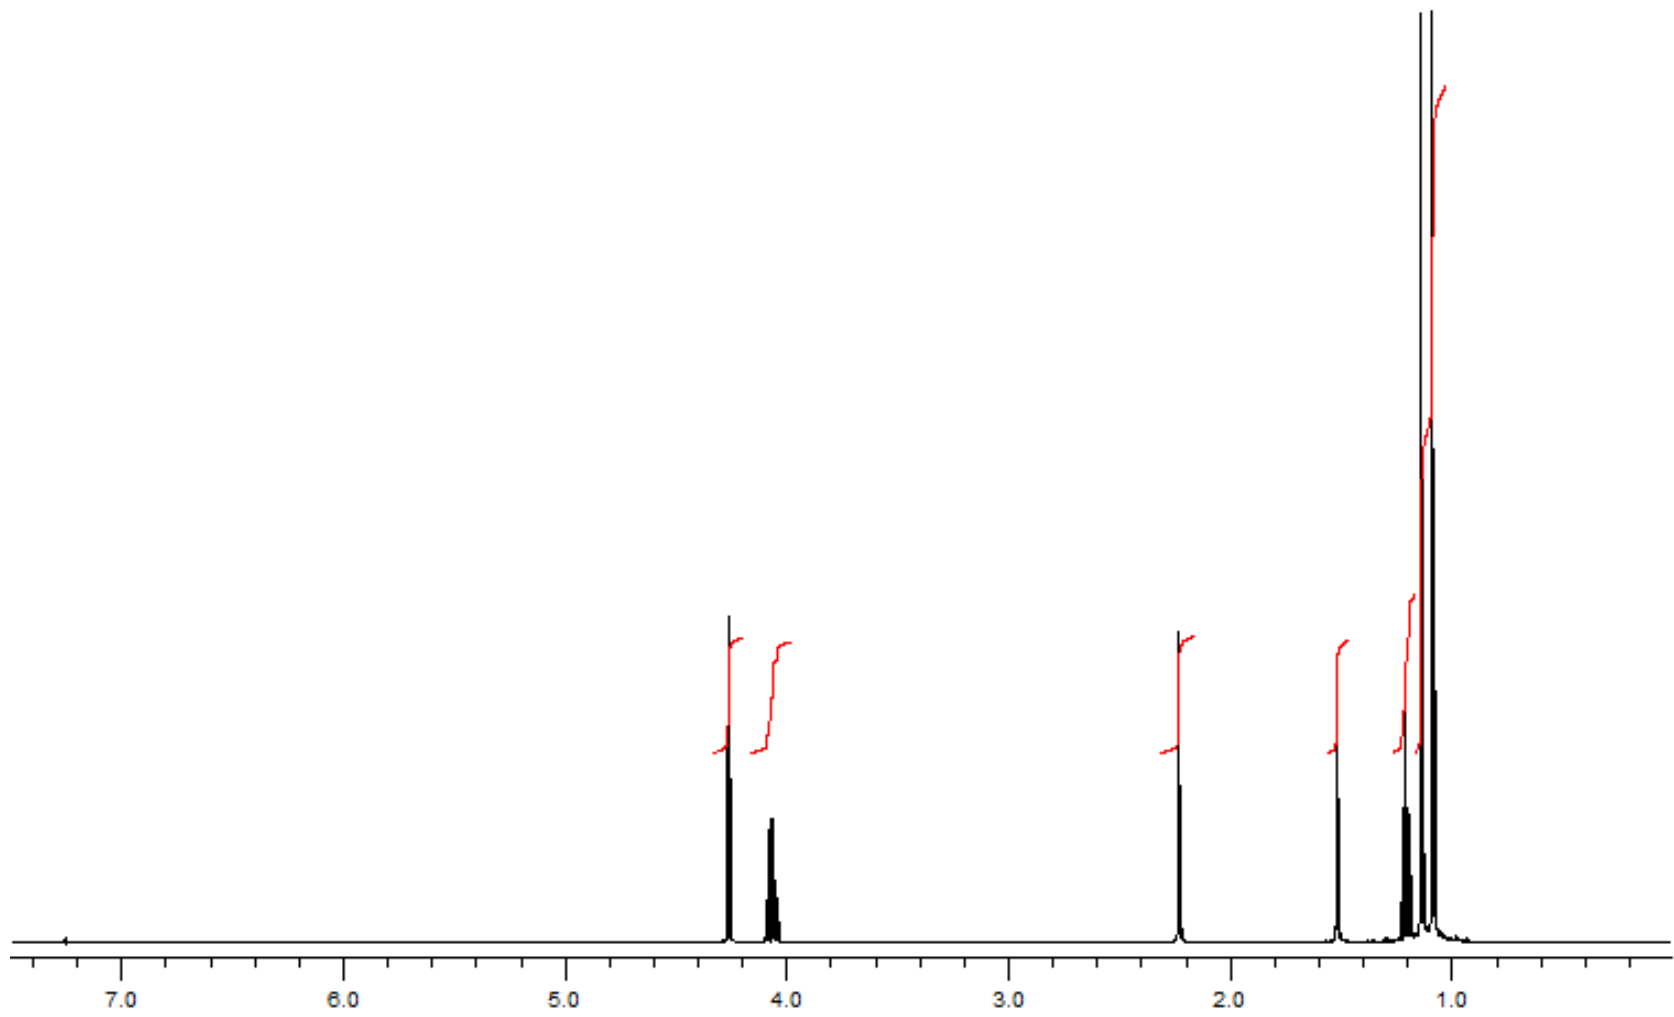

$^{13}\text{C}$ -NMR of compound **2a**

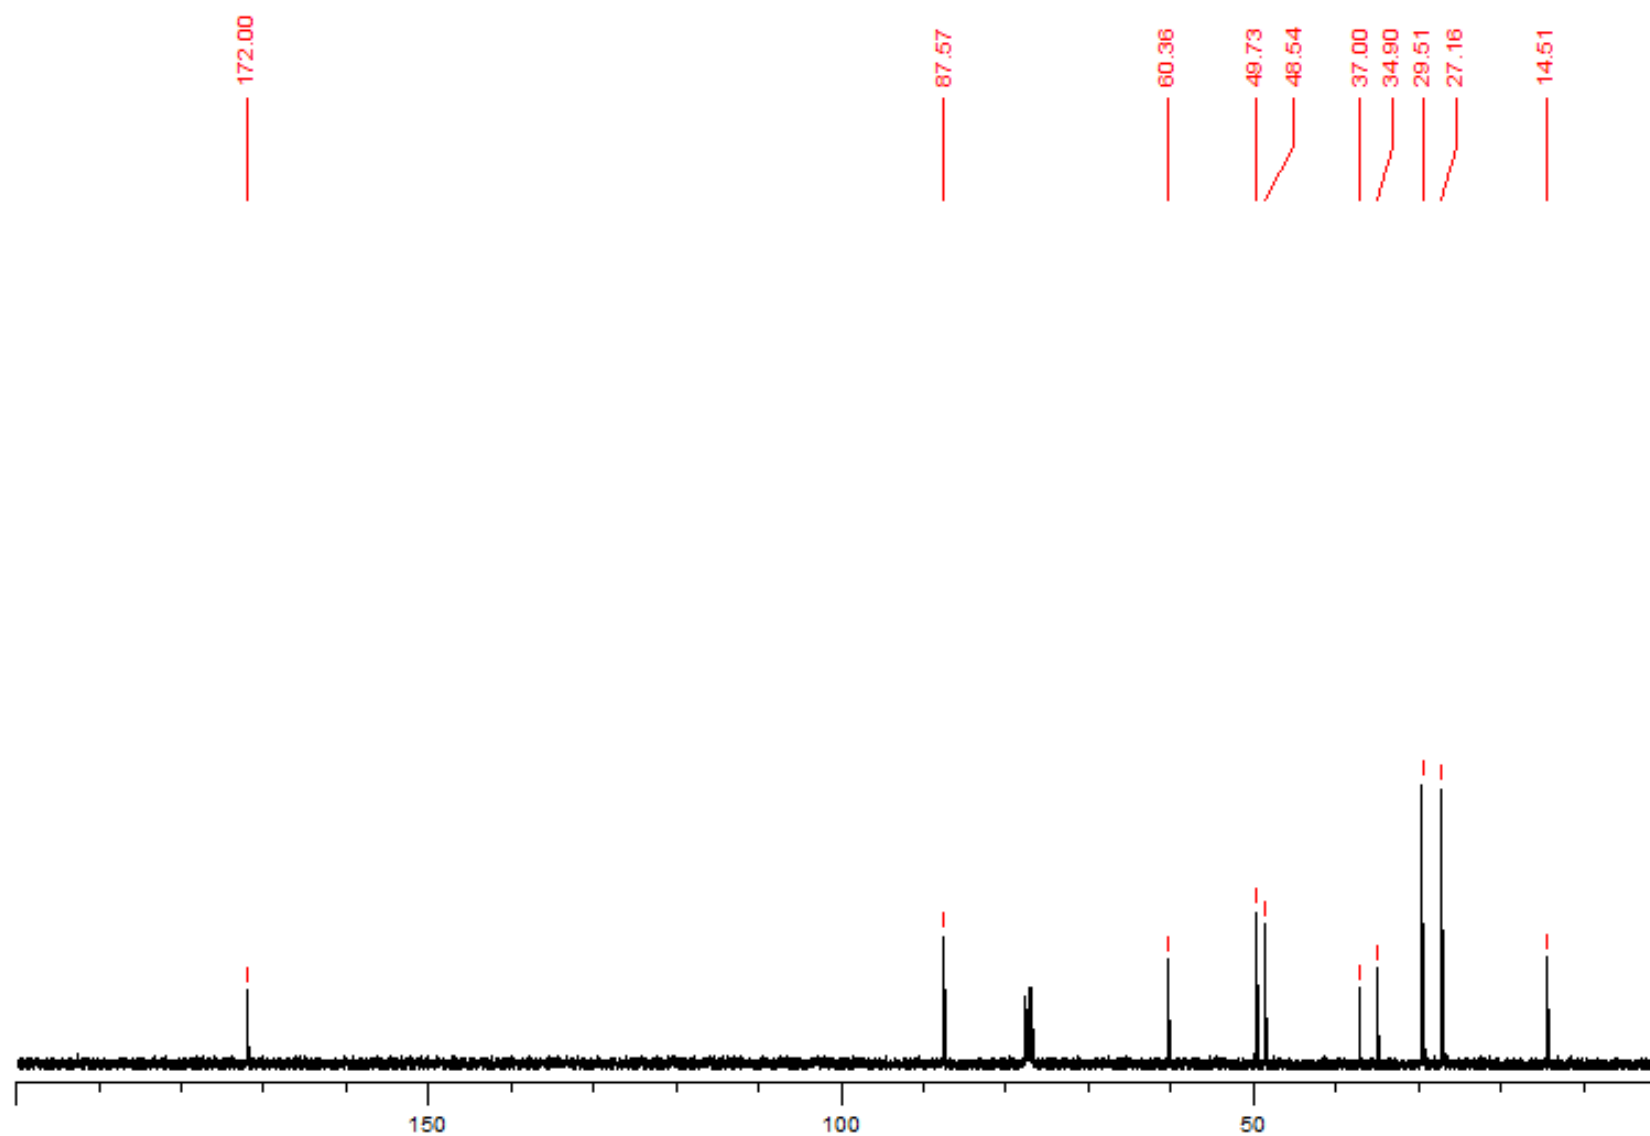

$^1\text{H}$ -NMR of compound **2b**

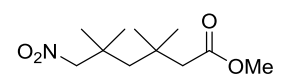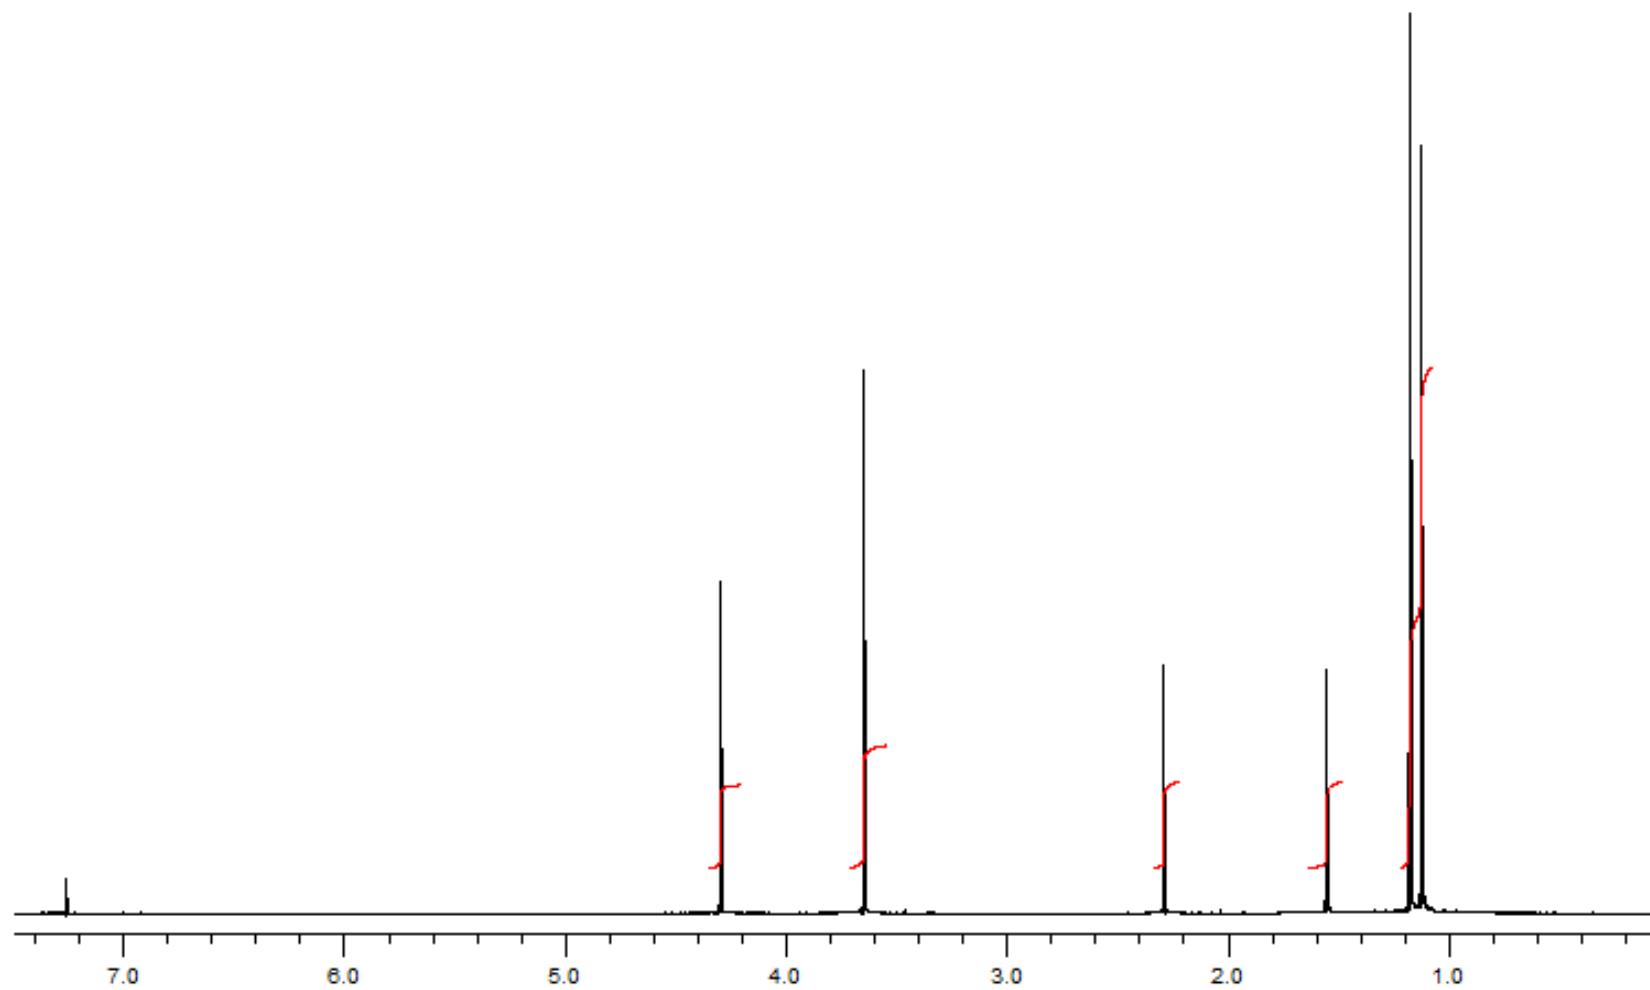

$^{13}\text{C}$ -NMR of compound **2b**

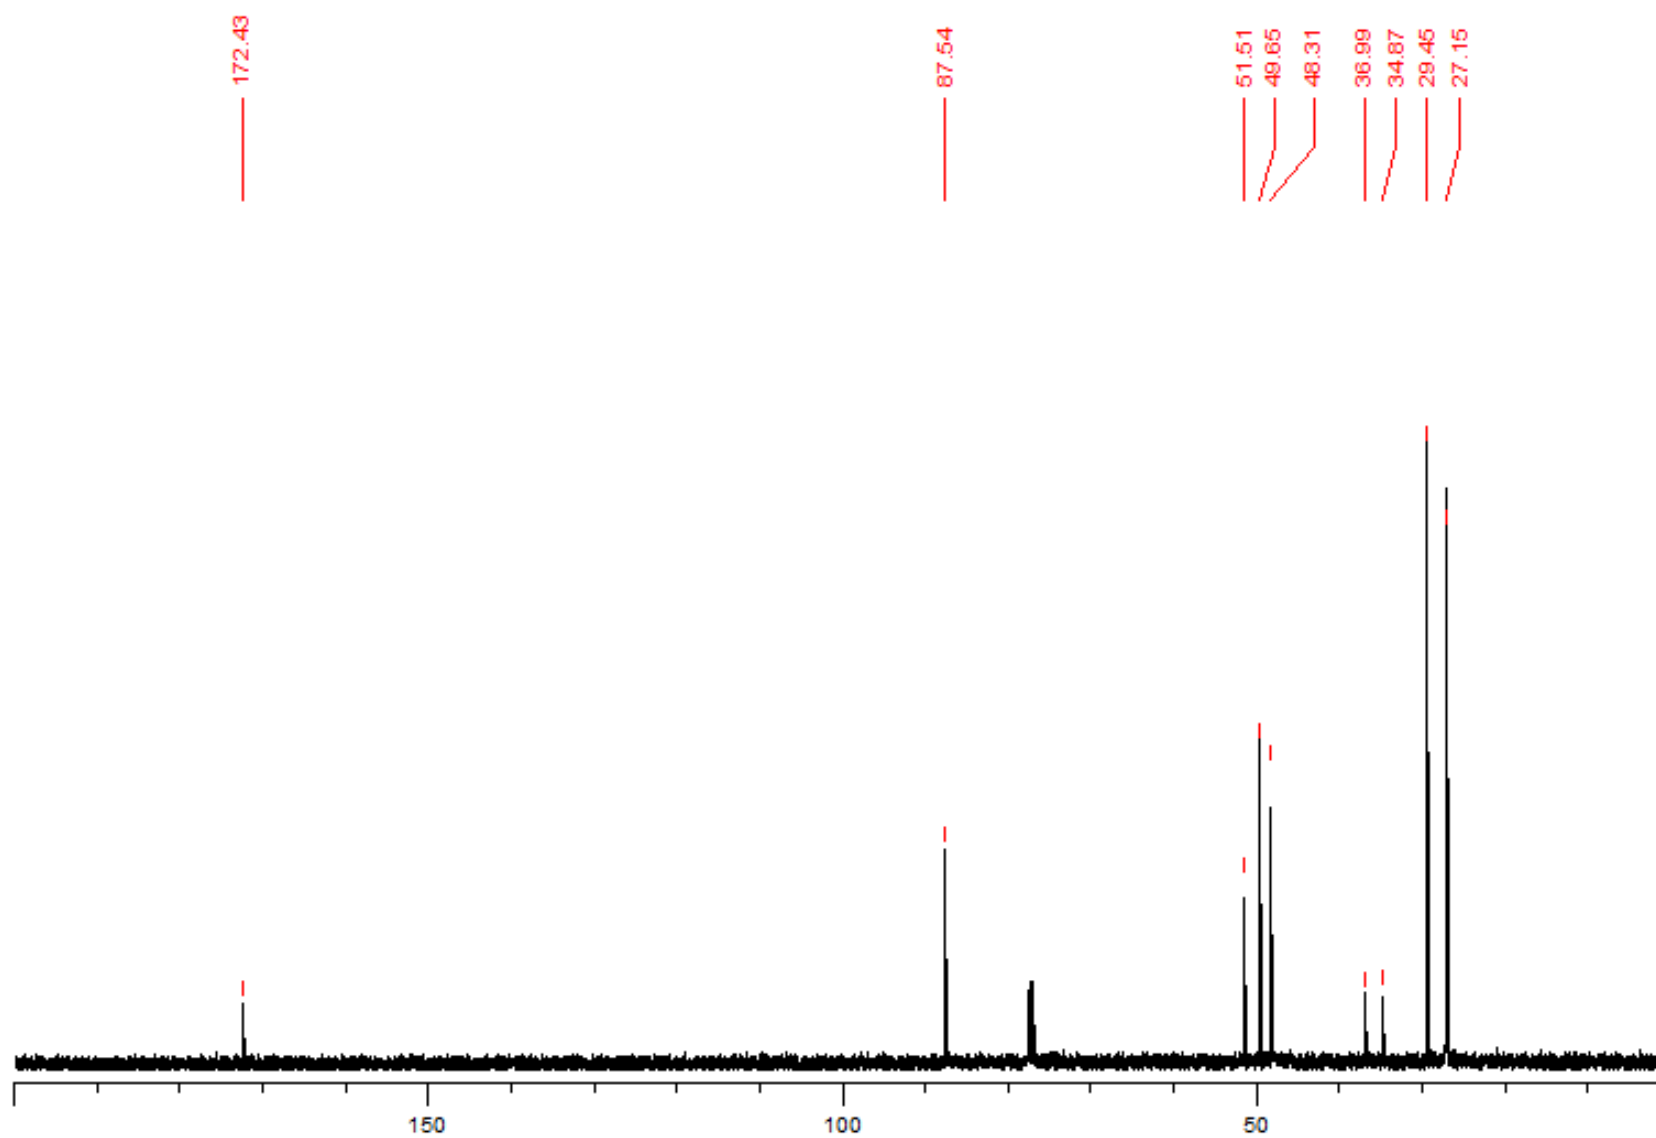

<sup>1</sup>H-NMR of compound **2c**

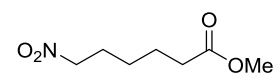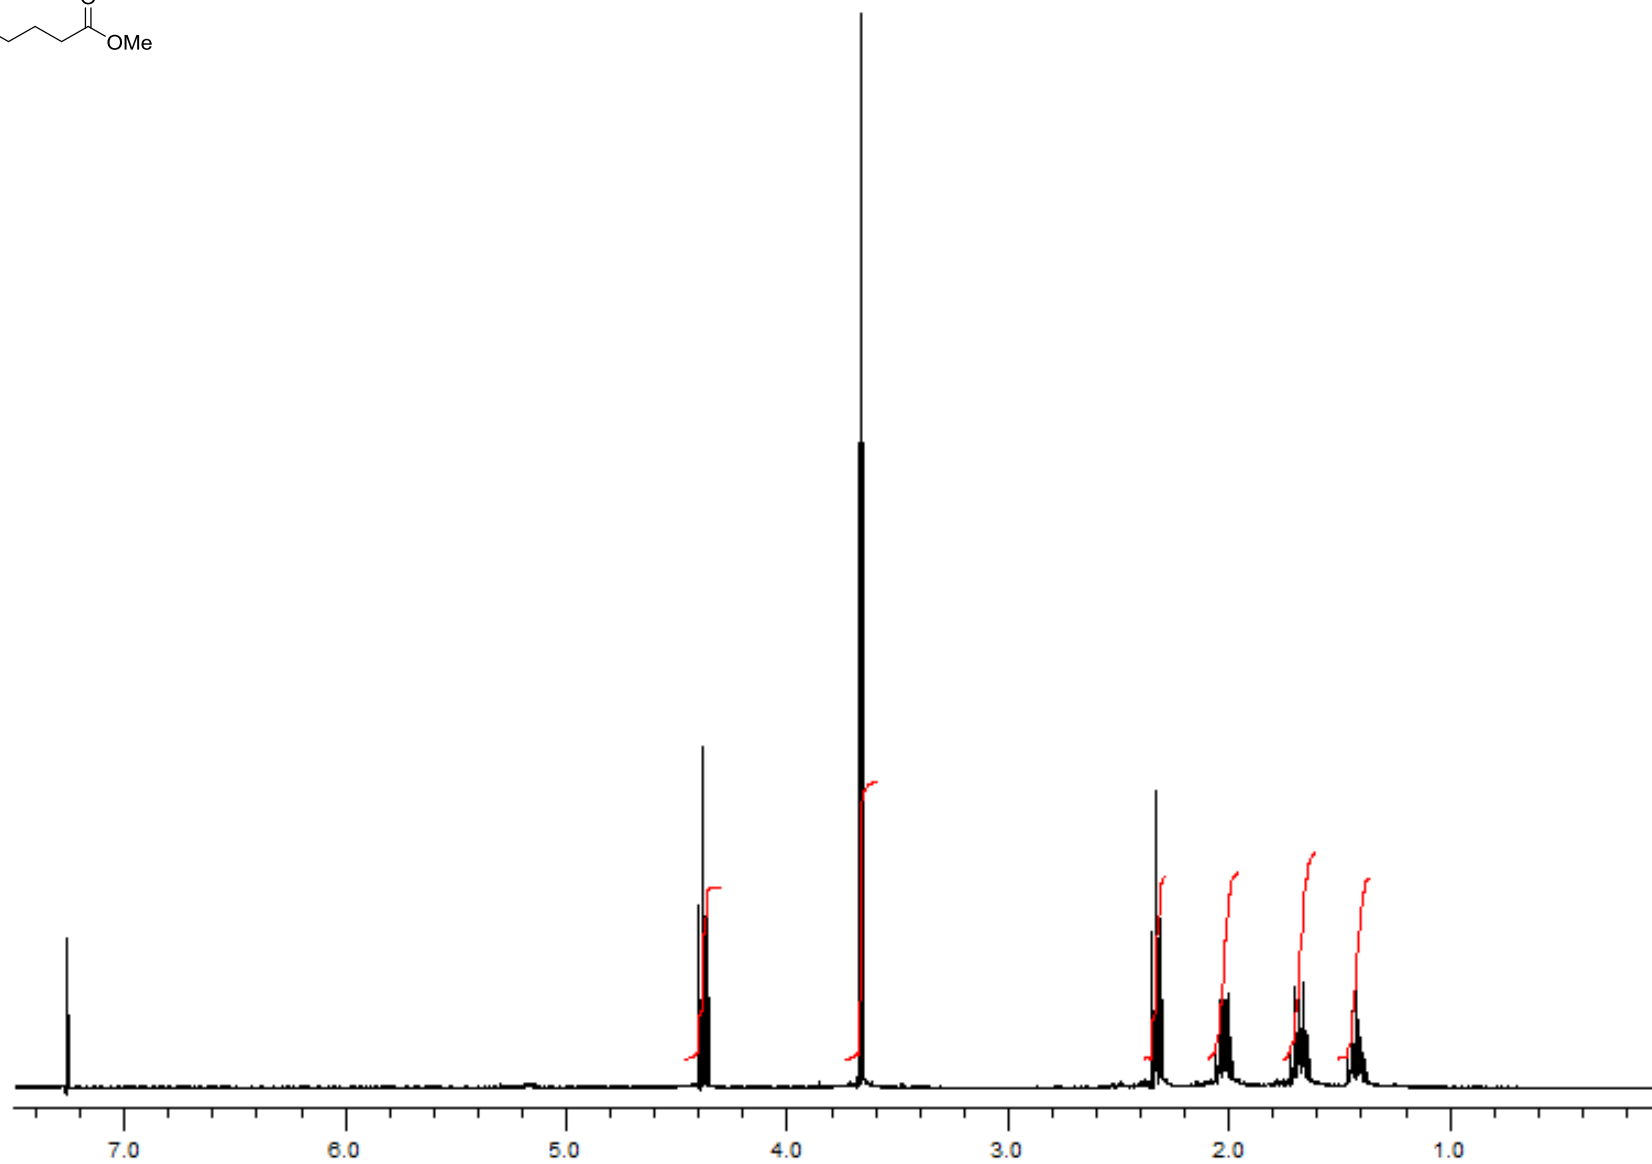

$^{13}\text{C}$ -NMR of compound **2c**

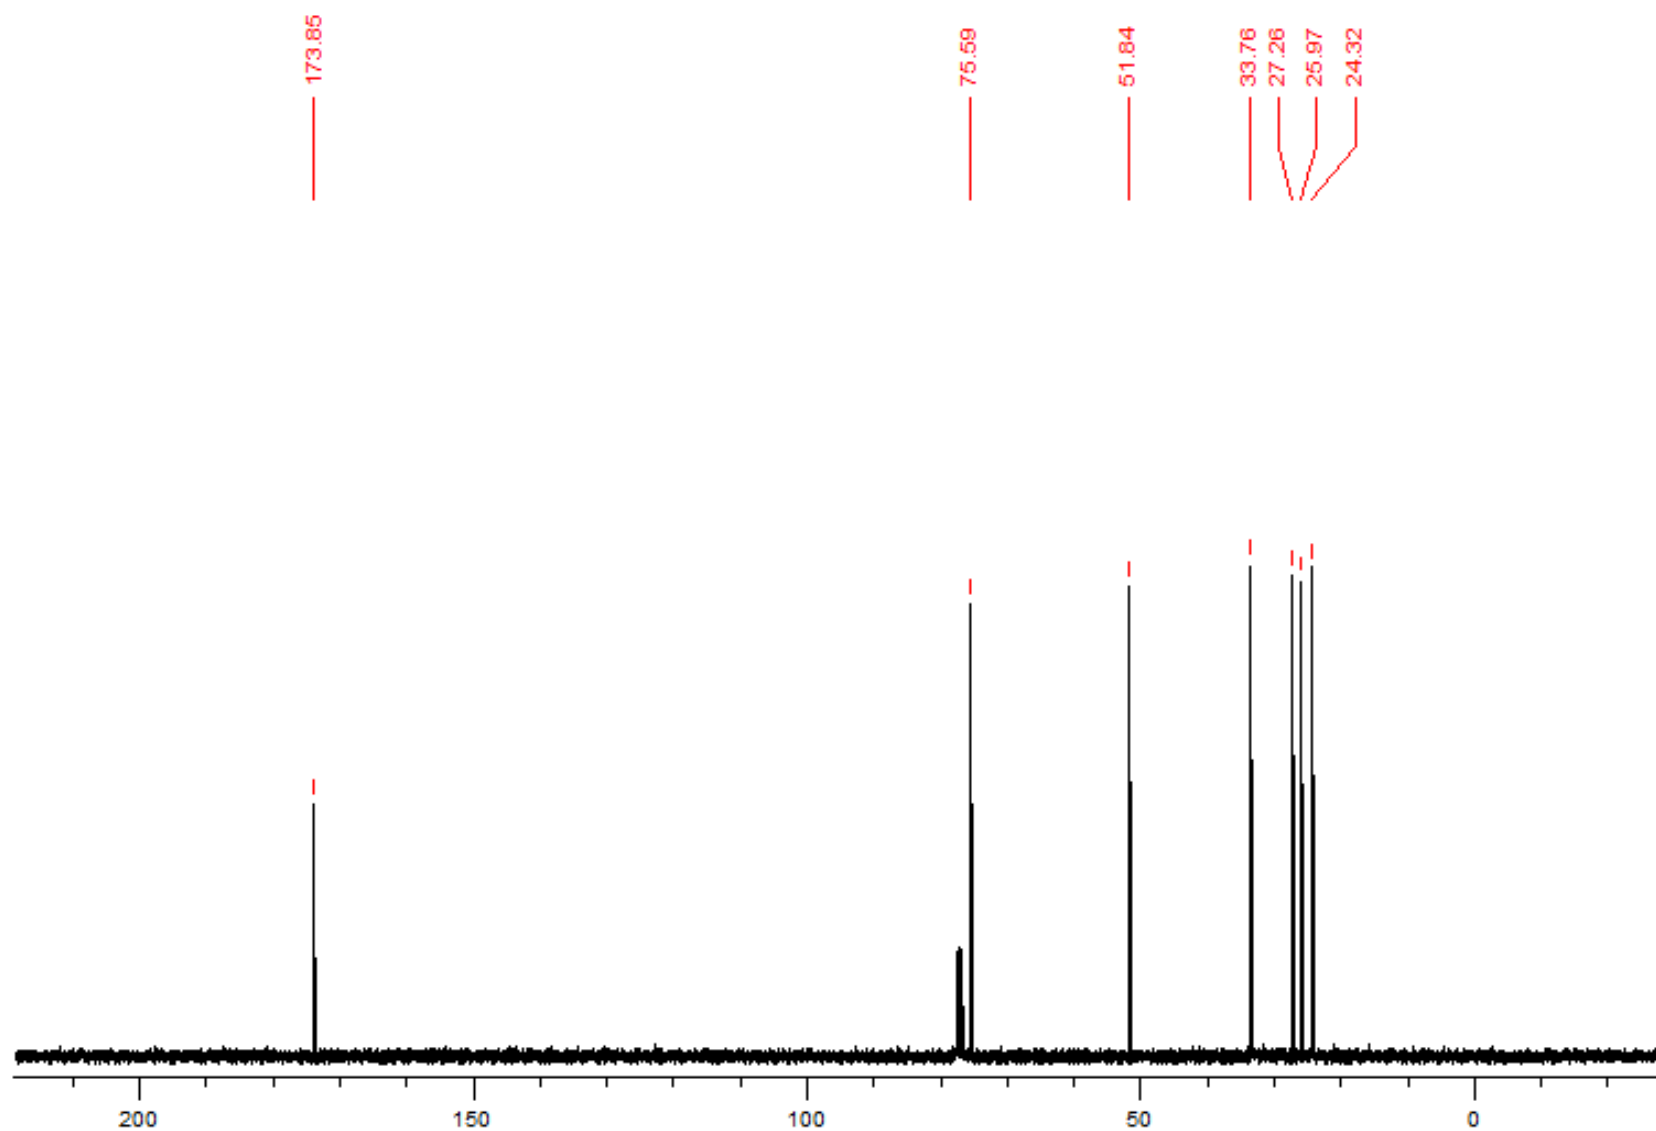

$^1\text{H}$ -NMR of compound **2d**

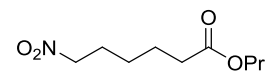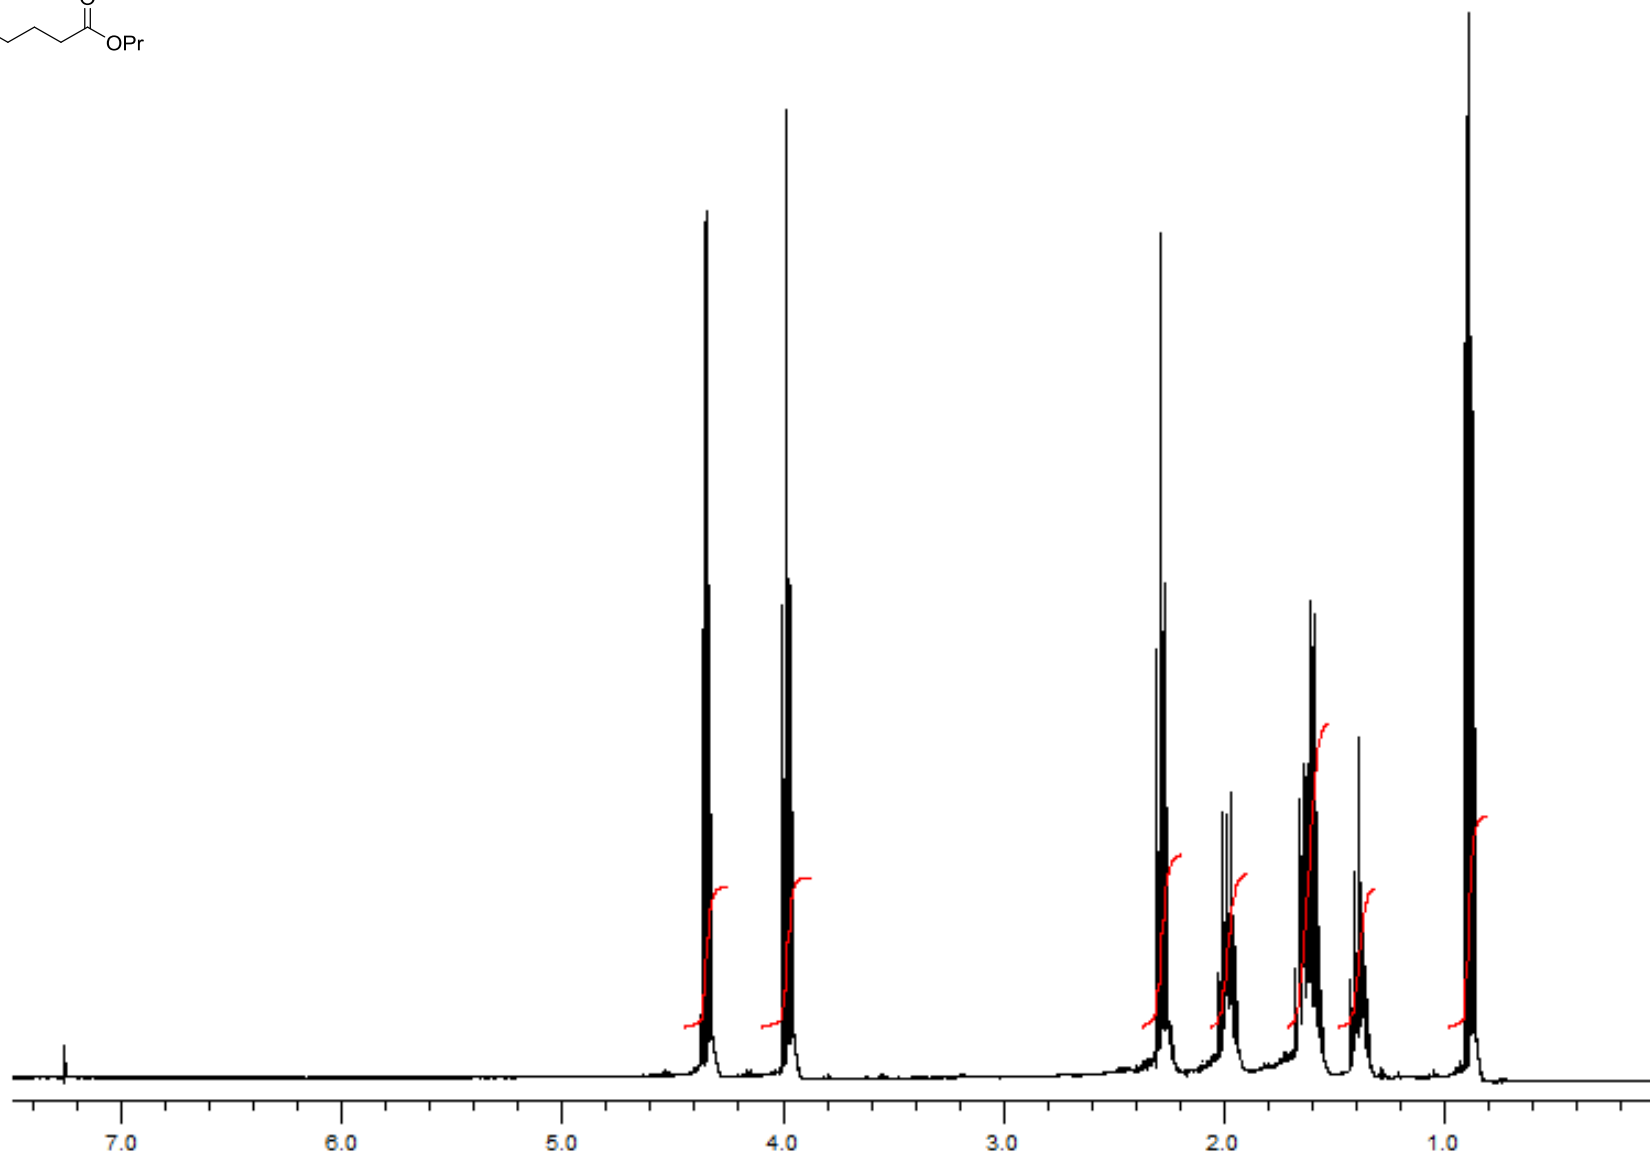

$^{13}\text{C}$ -NMR of compound **2d**

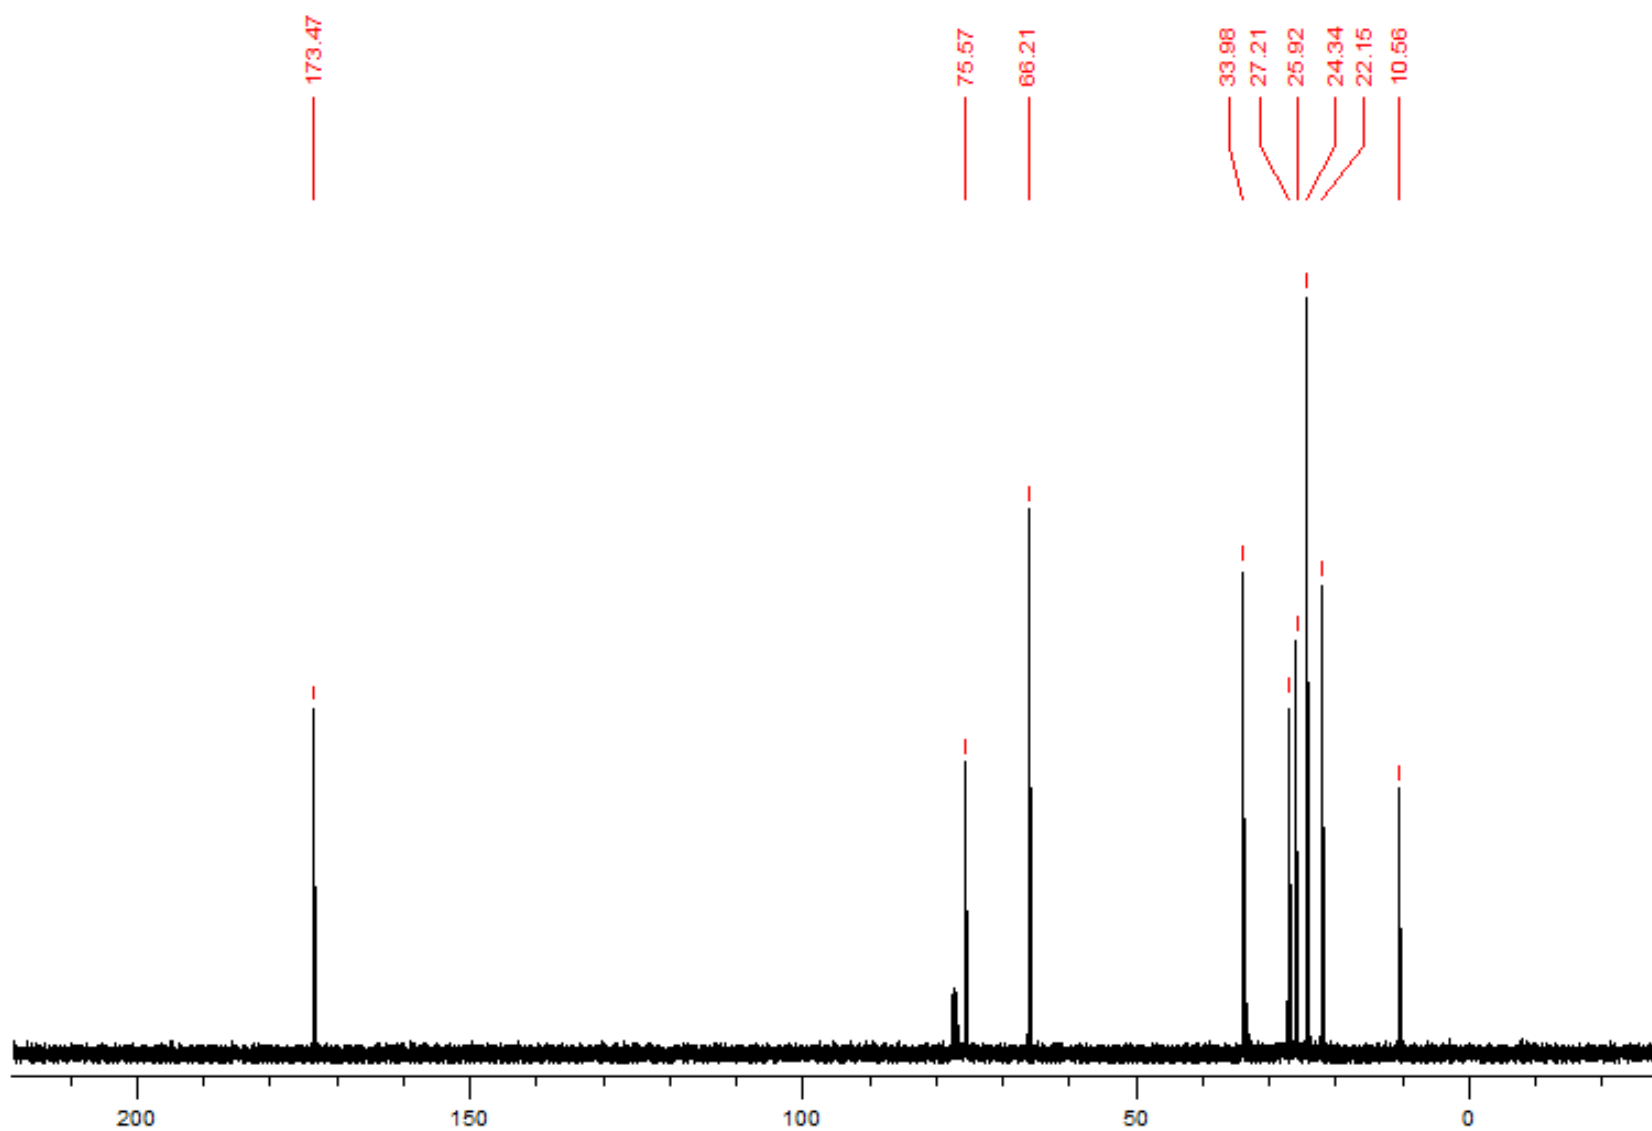



$^1\text{H}$ -NMR of compound **2e**

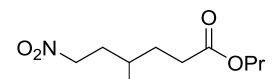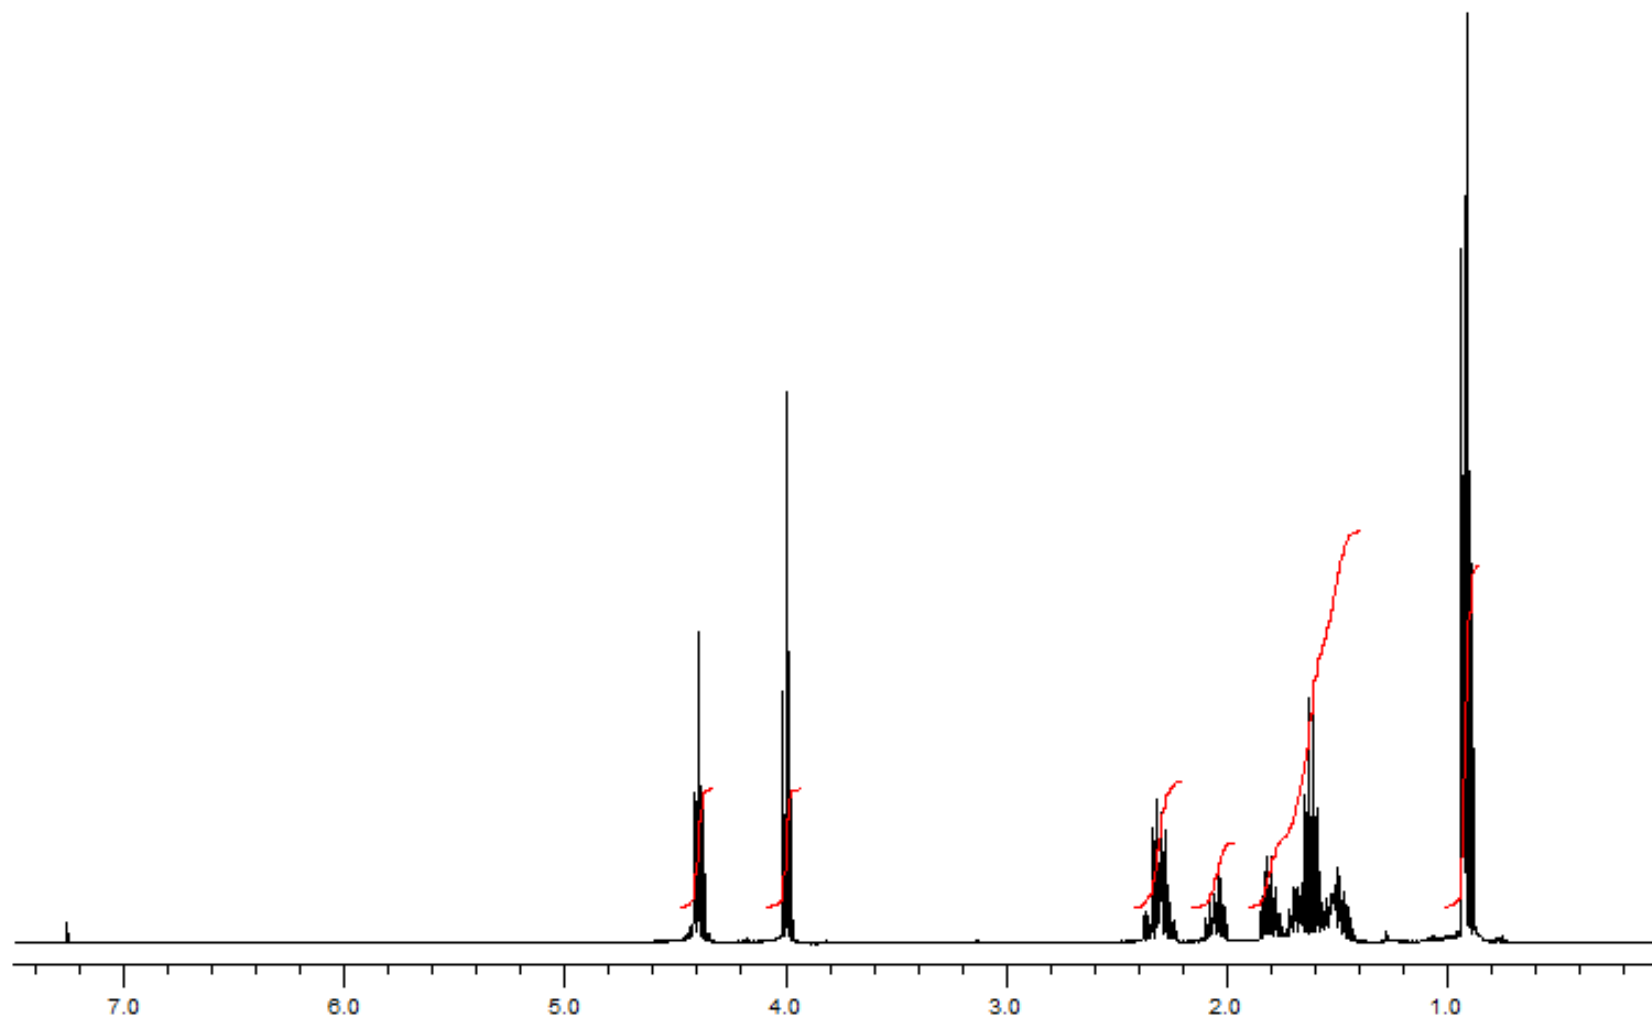

$^{13}\text{C}$ -NMR of compound **2e**

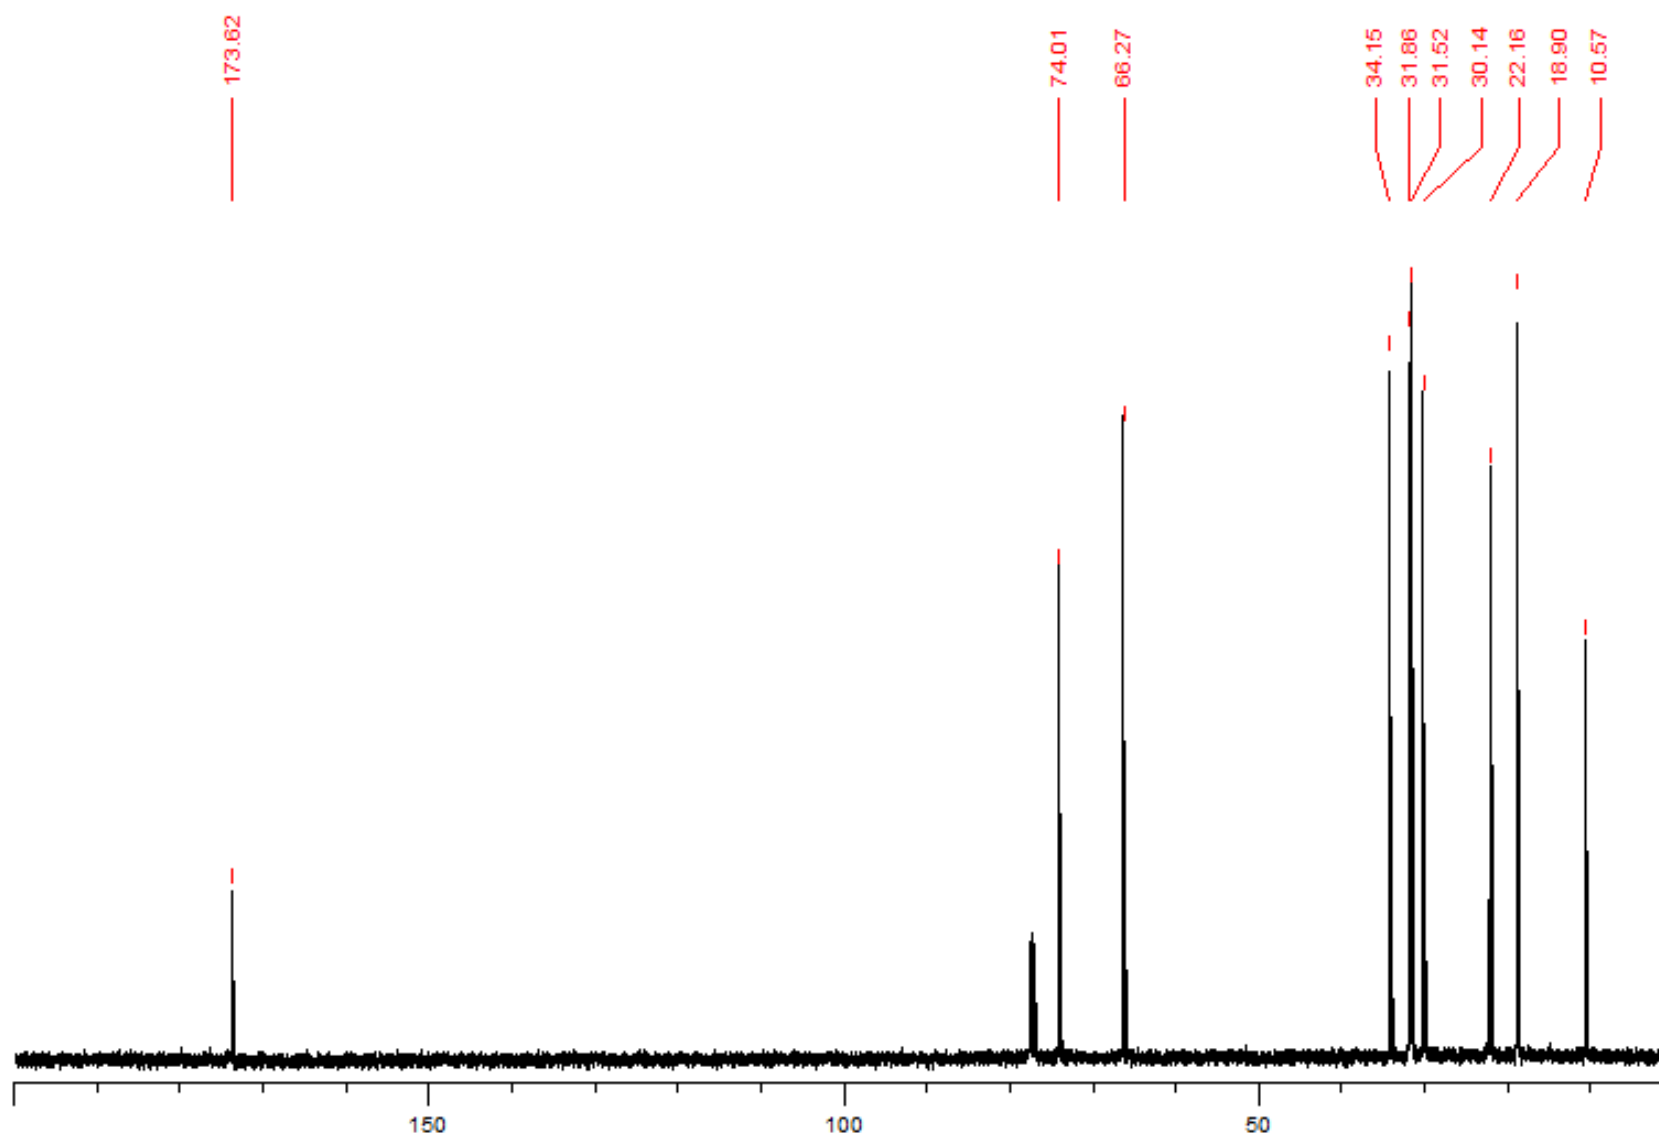

<sup>1</sup>H-NMR of compound **2f**

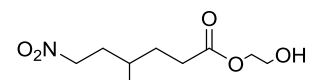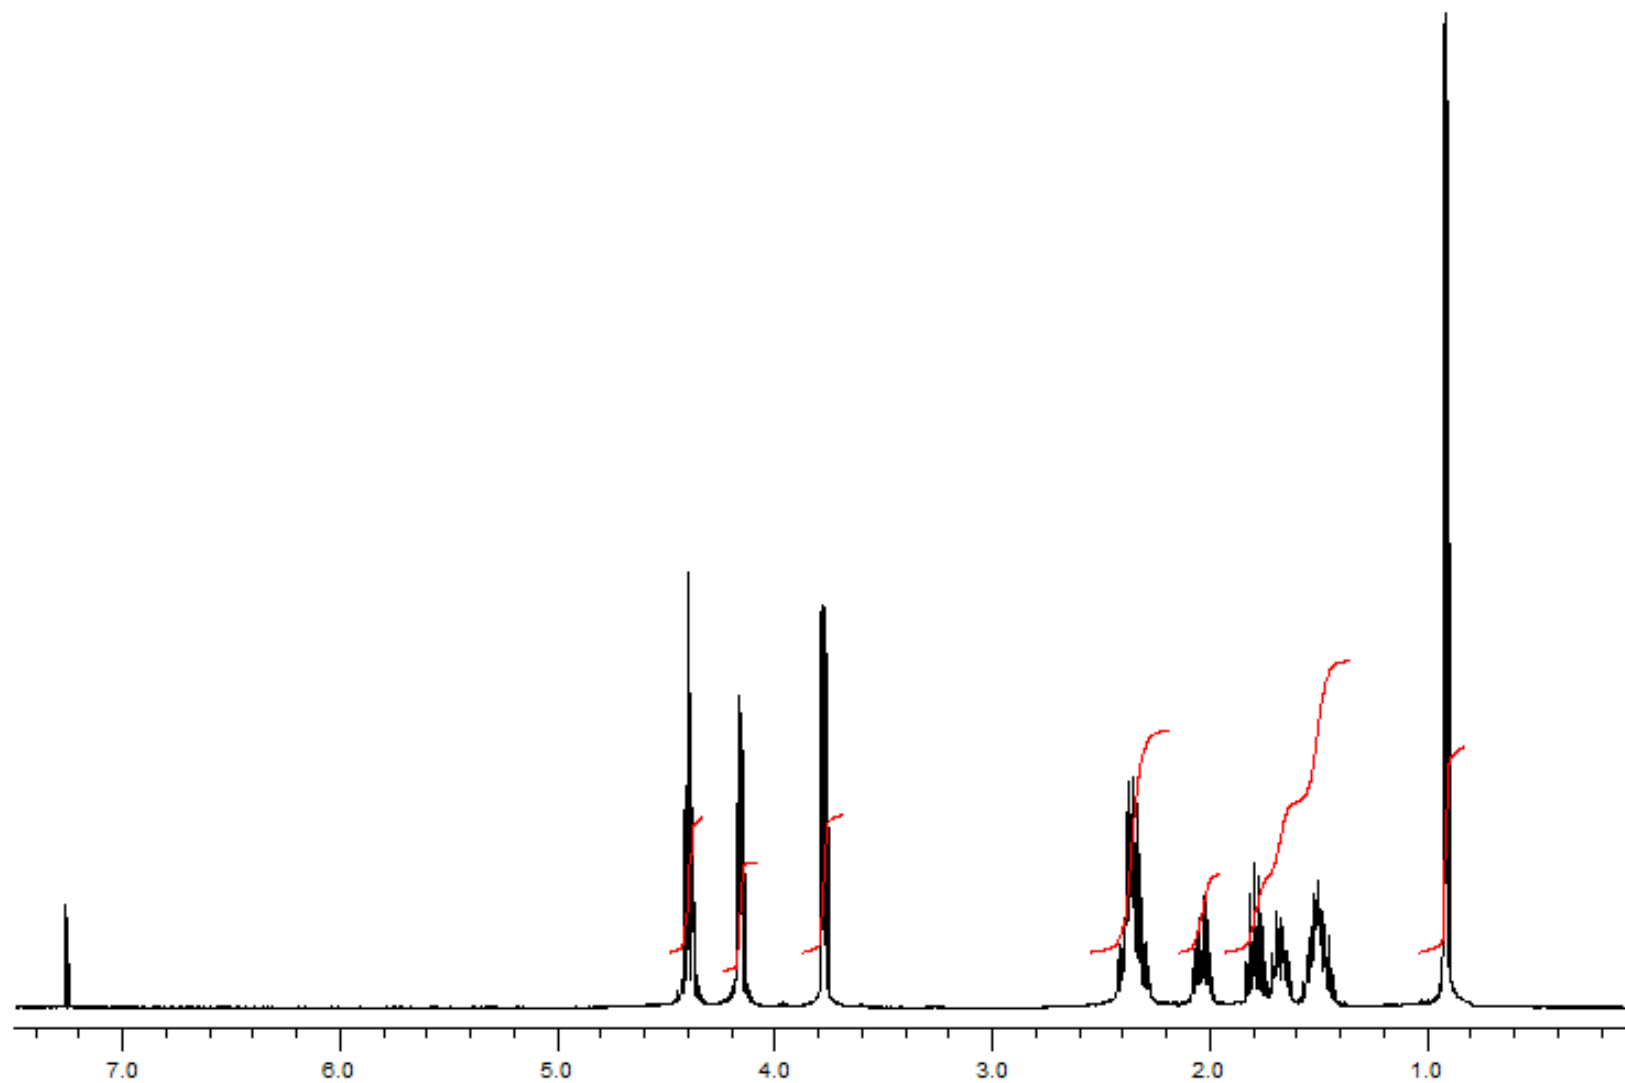

$^{13}\text{C}$ -NMR of compound **2f**

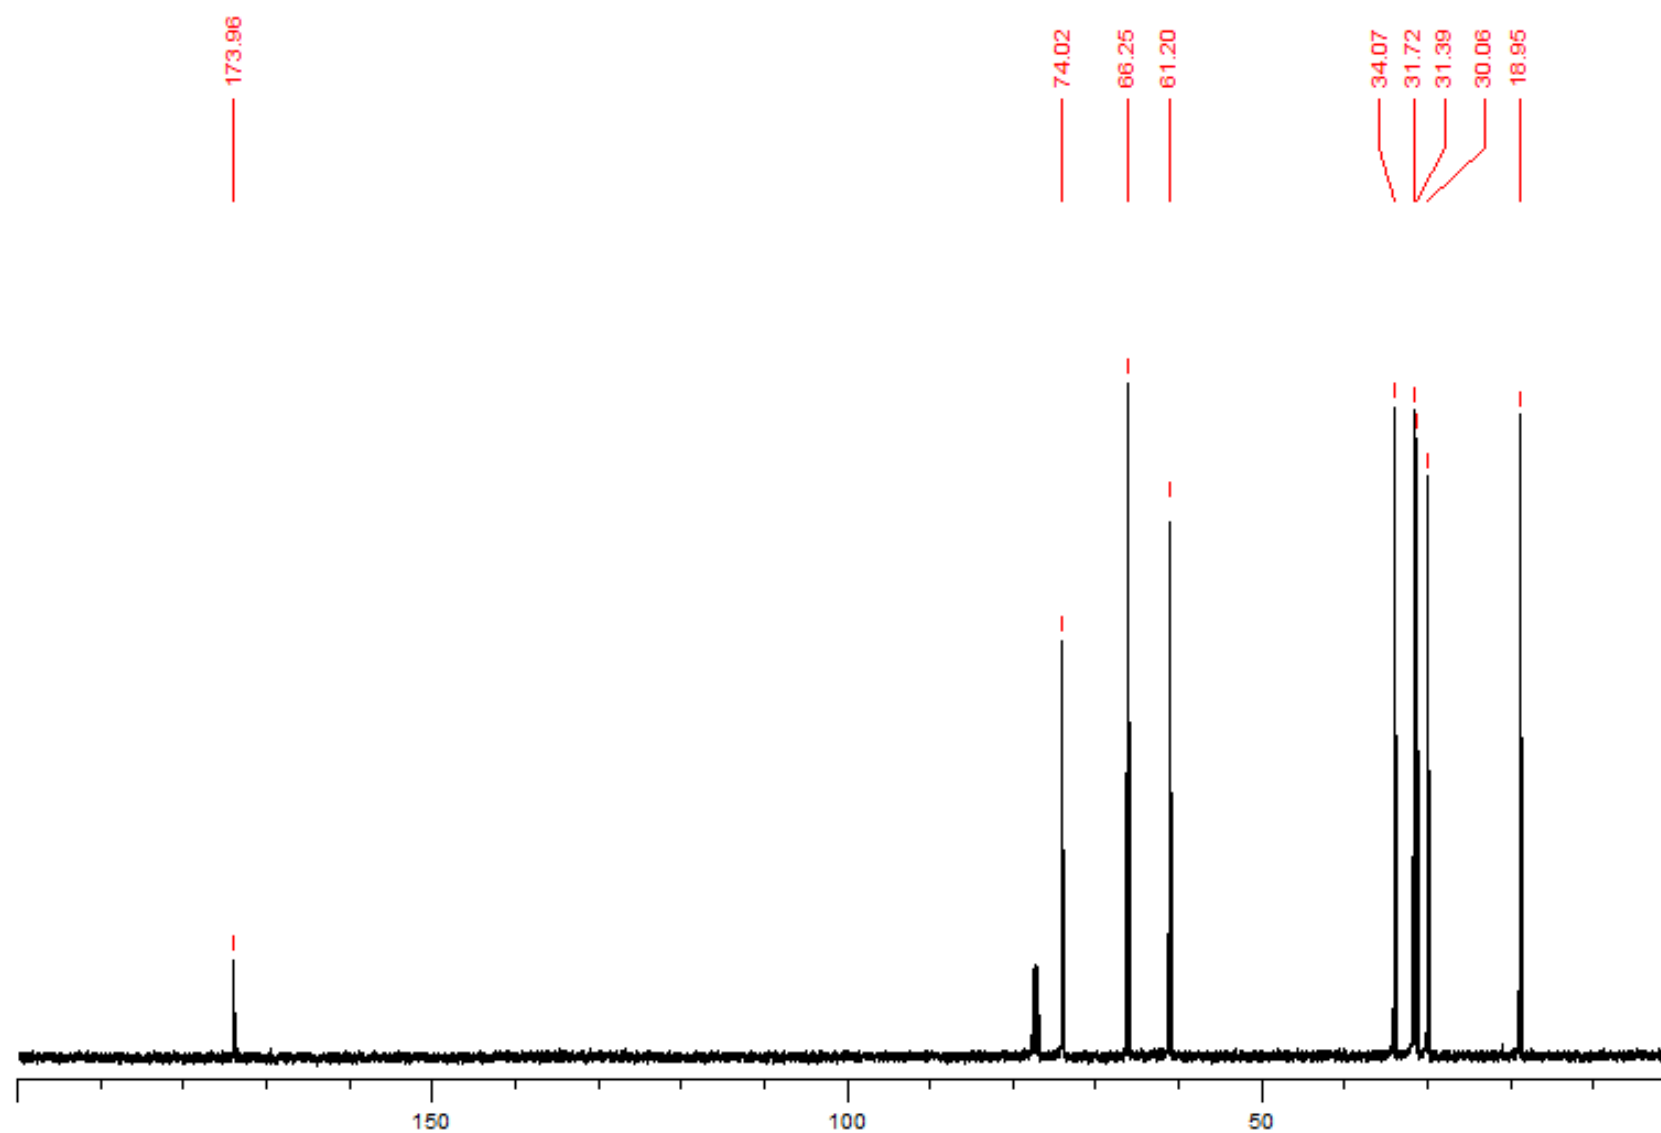

<sup>1</sup>H-NMR of compound **2g**

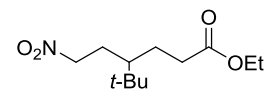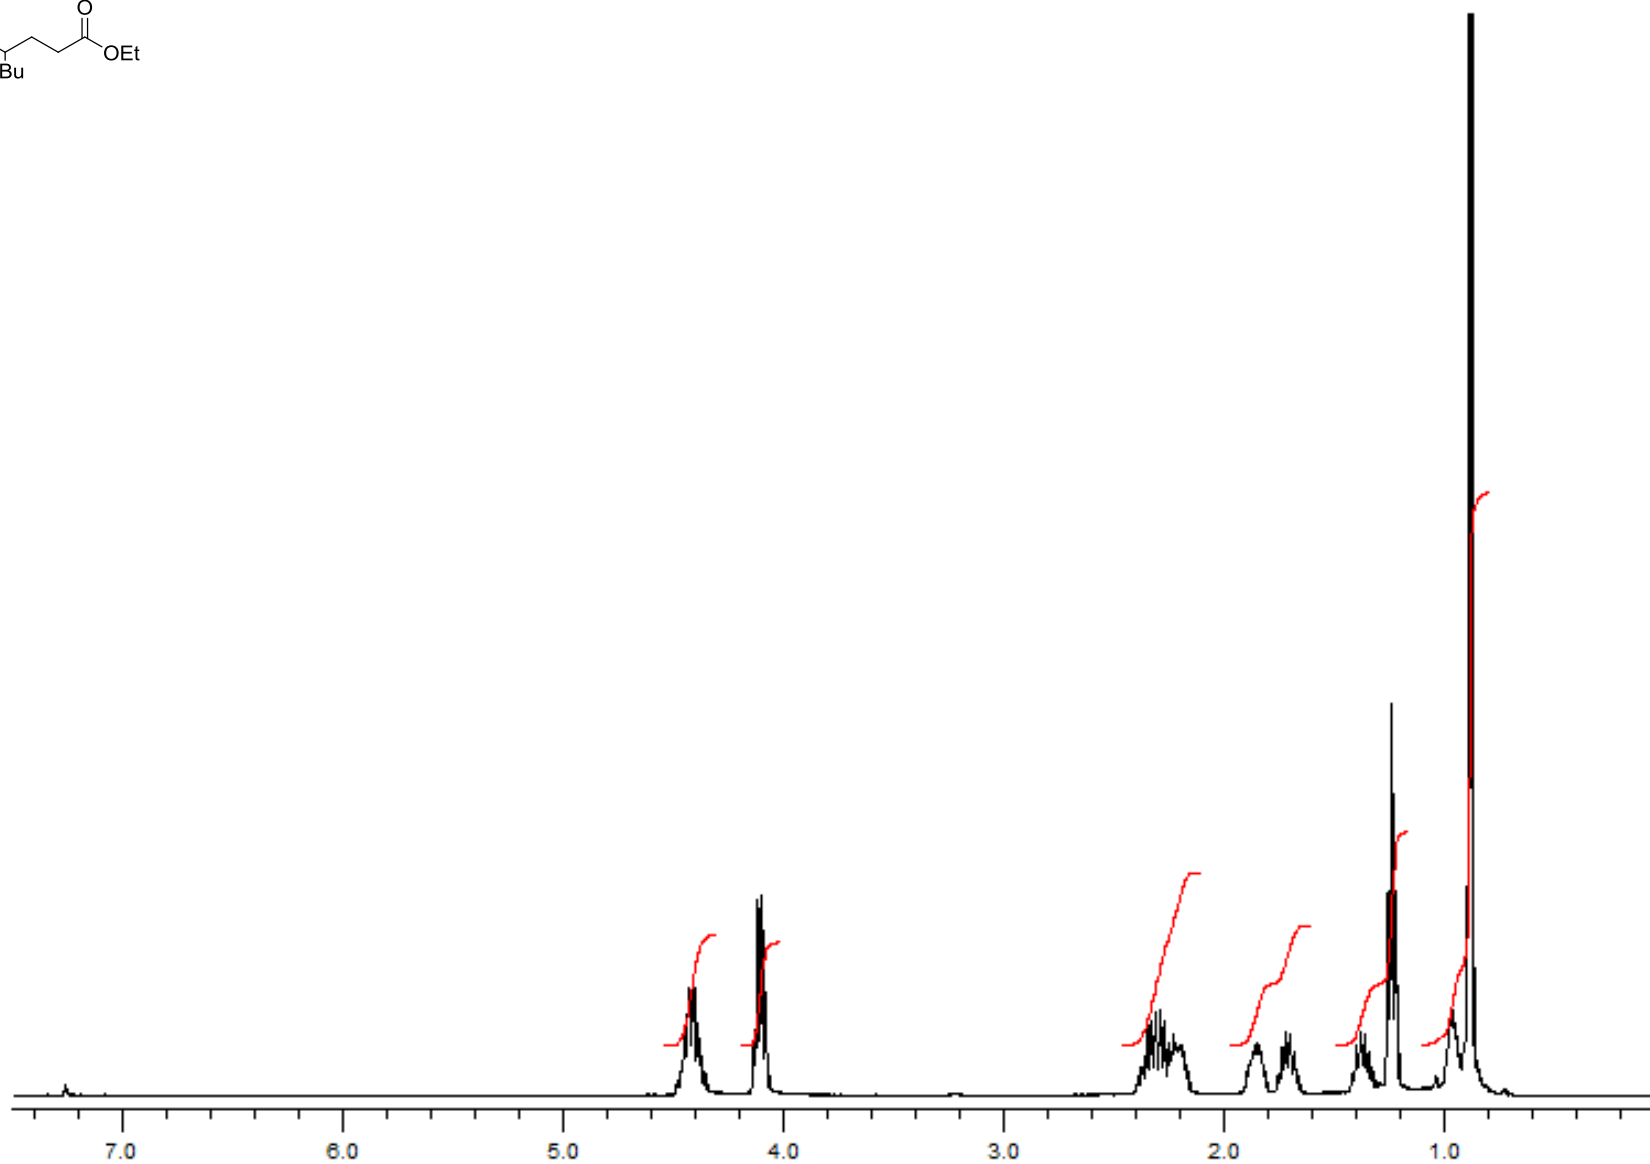

$^{13}\text{C}$ -NMR of compound **2g**

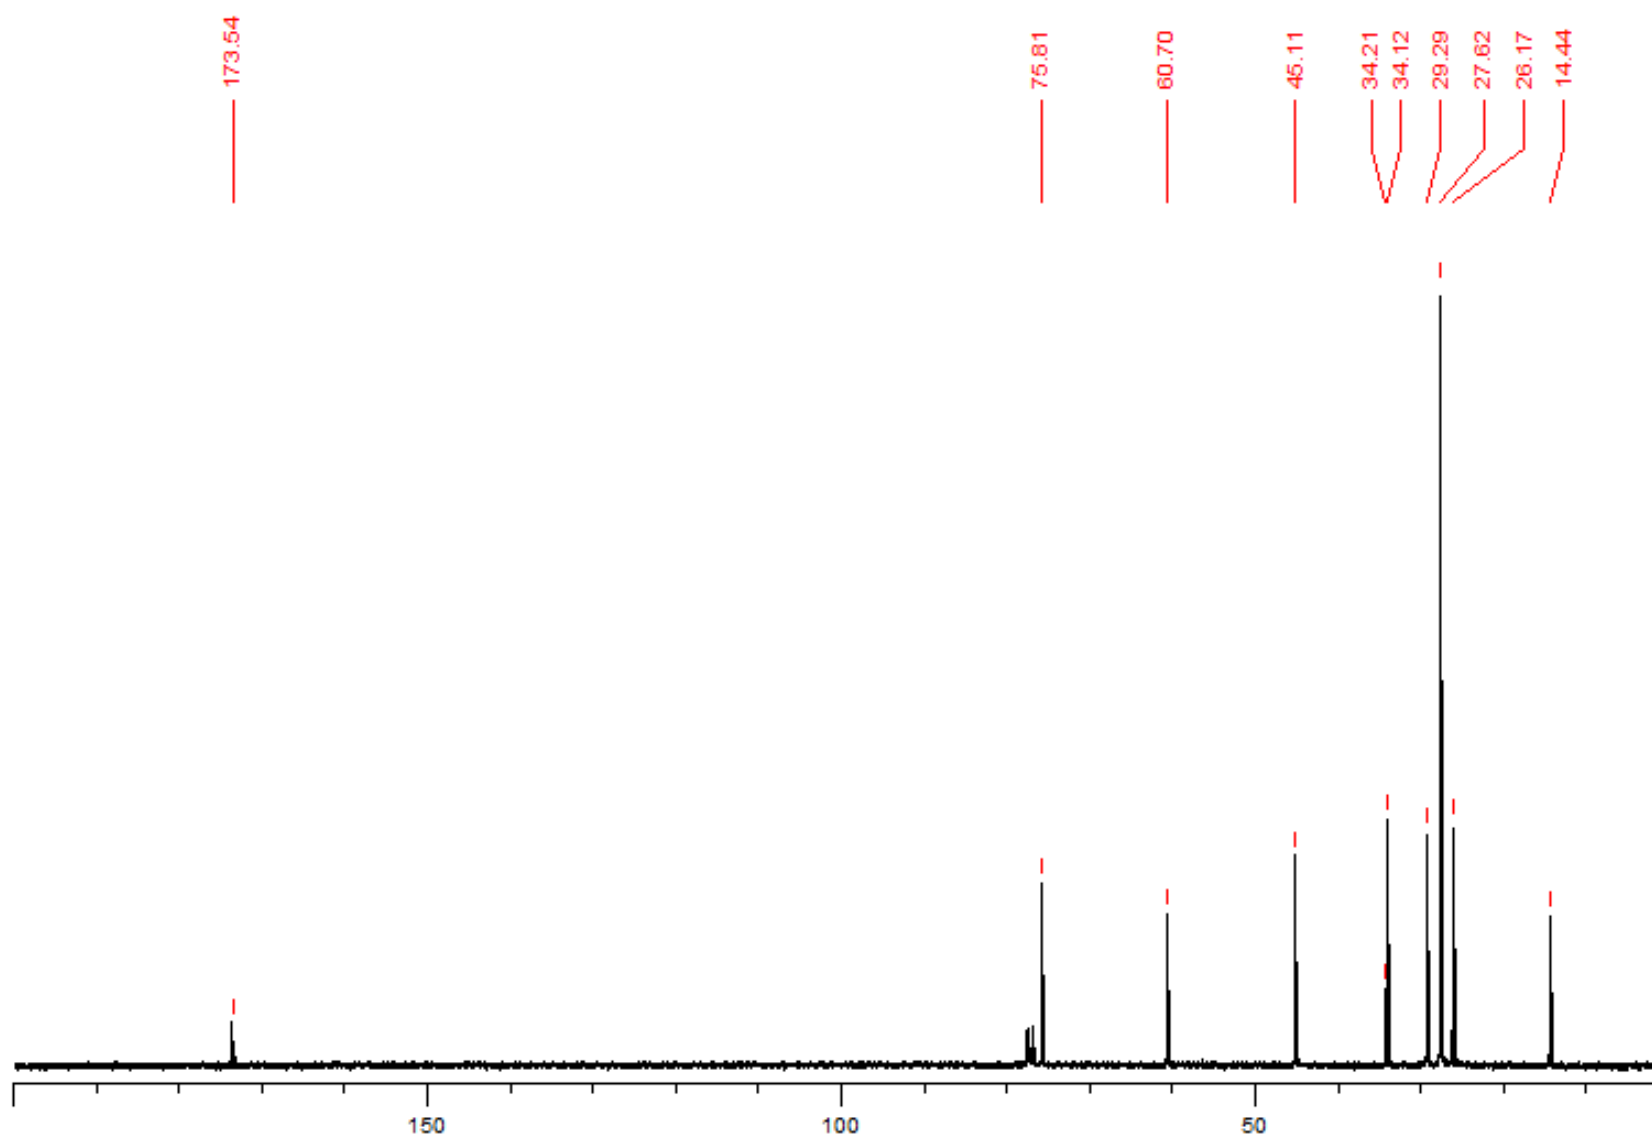

$^1\text{H}$ -NMR of compound **2h**

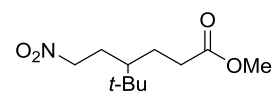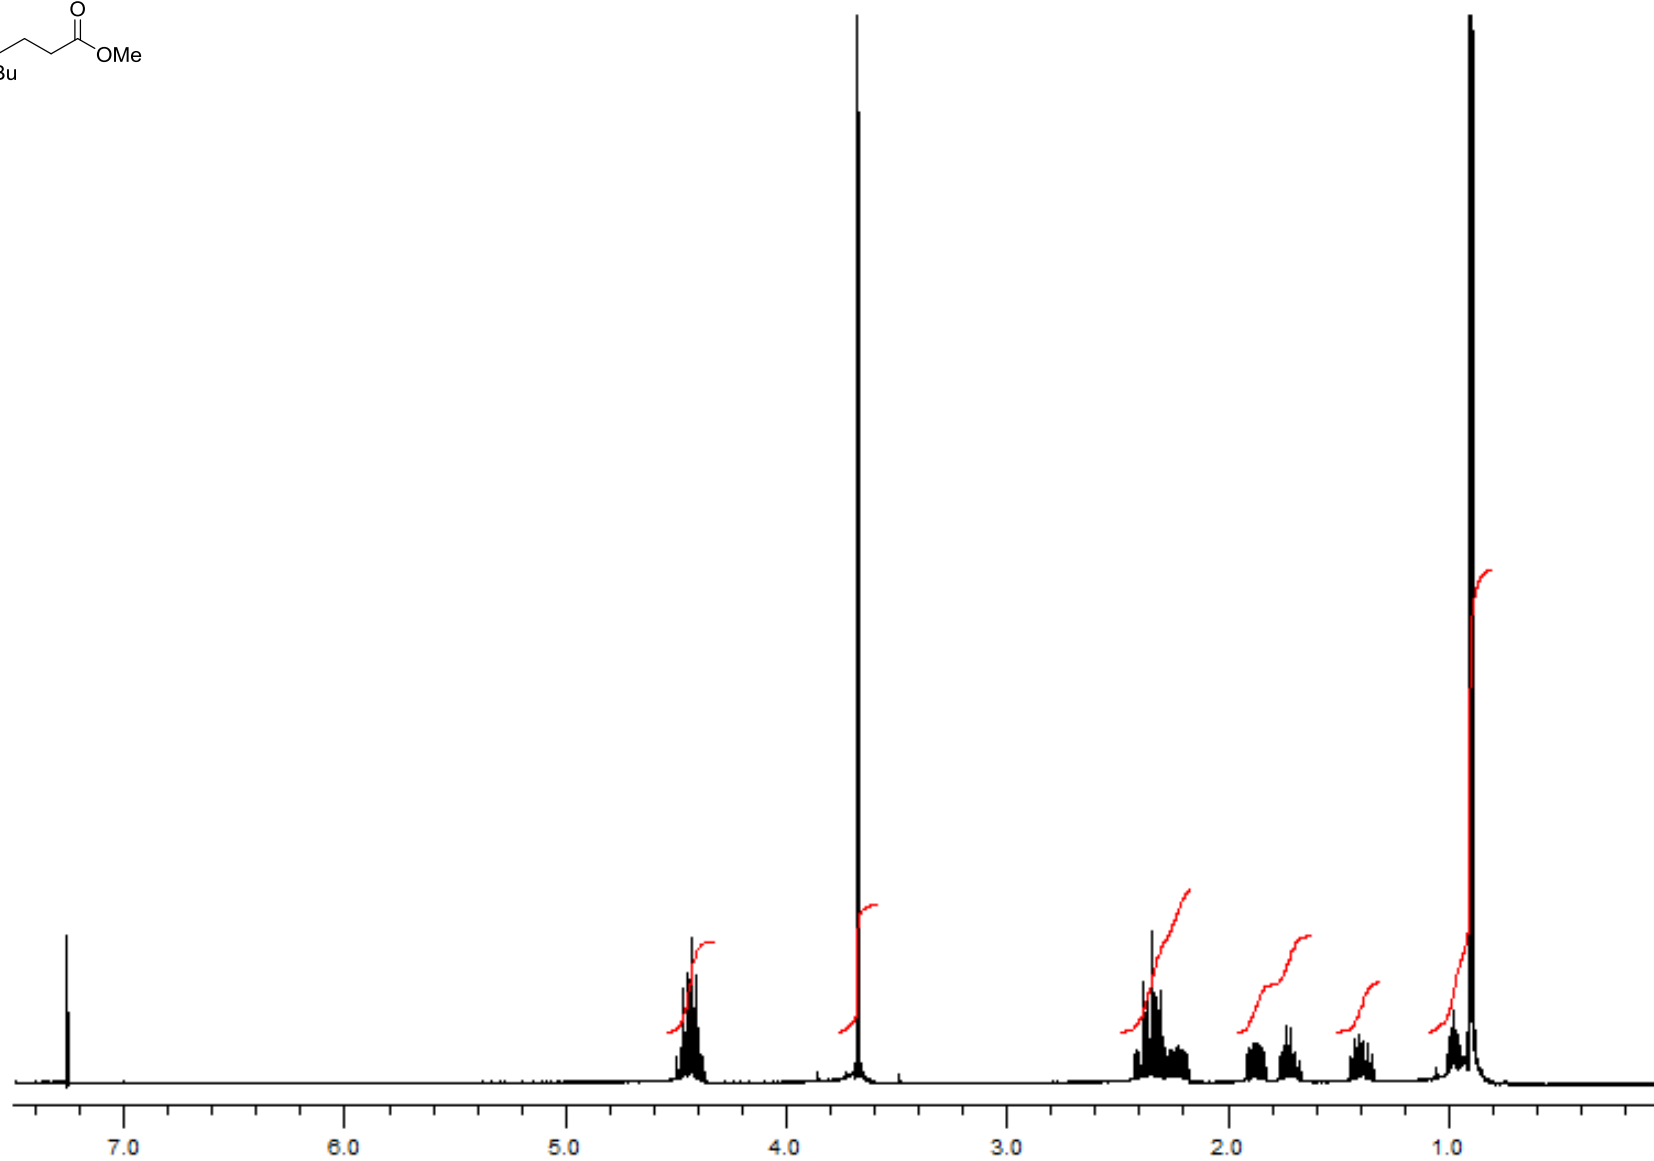

$^{13}\text{C}$ -NMR of compound **2h**

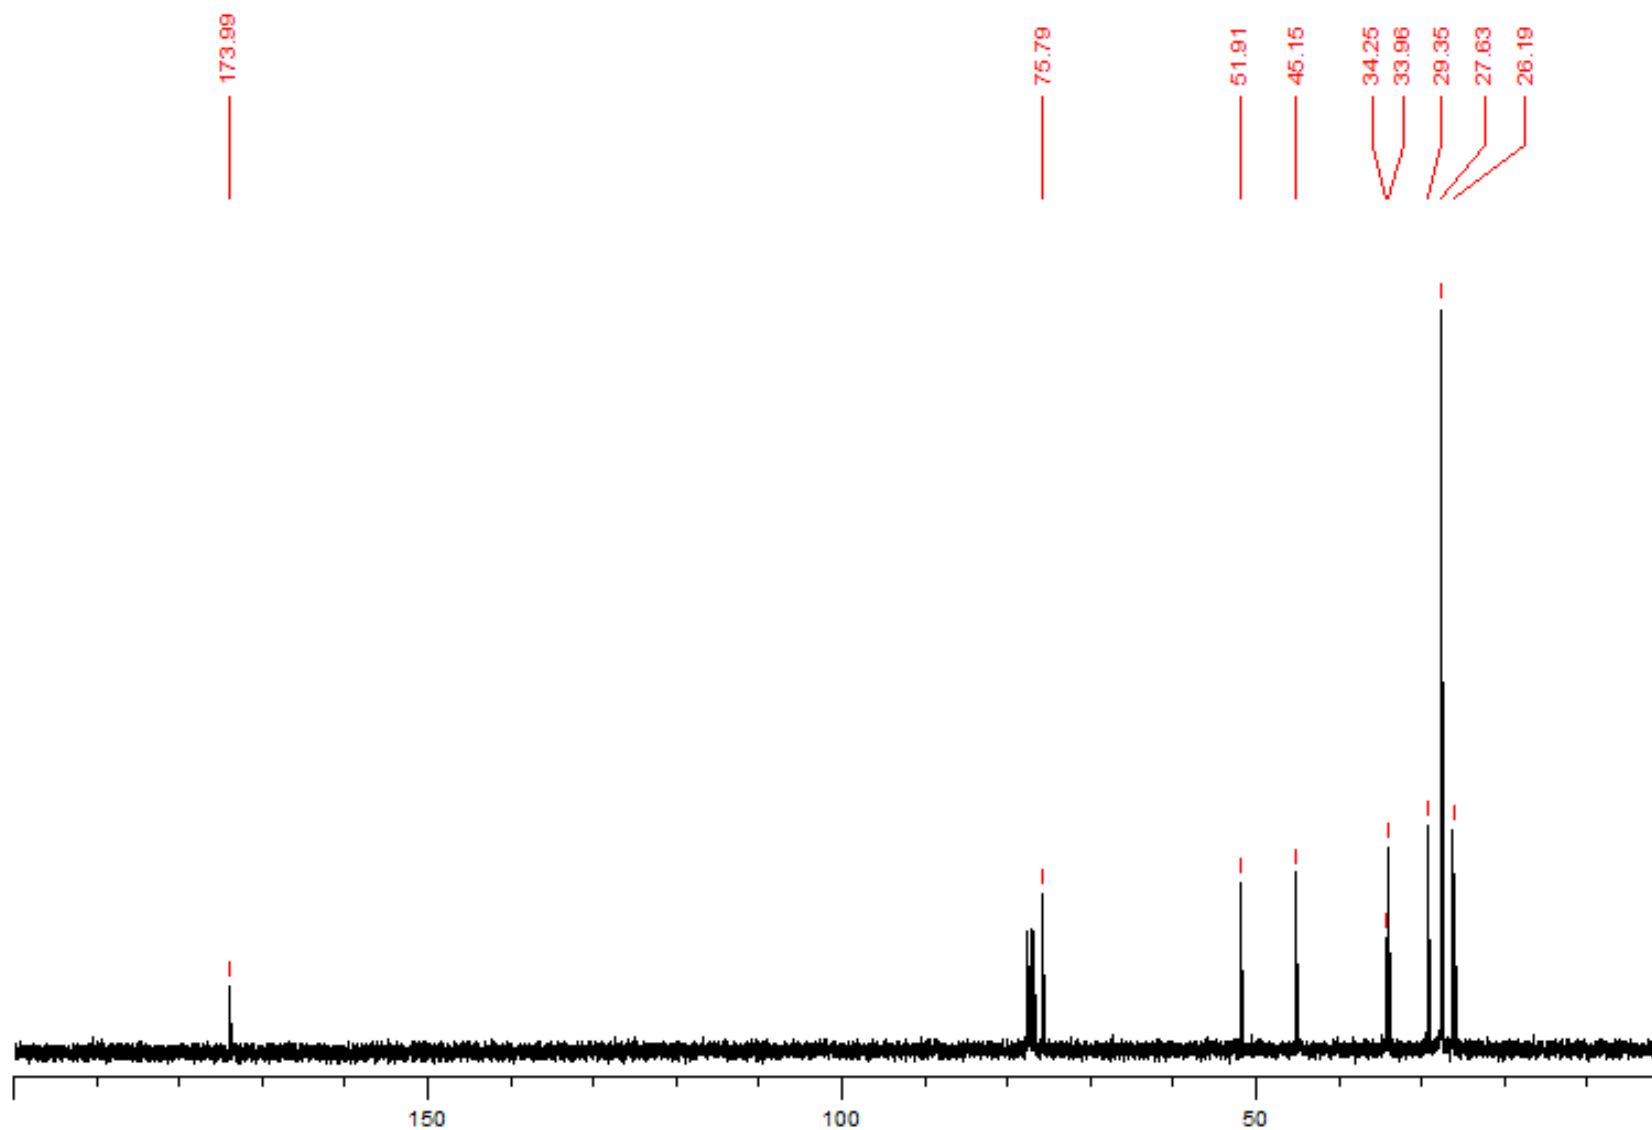



<sup>1</sup>H-NMR of compound **2i**

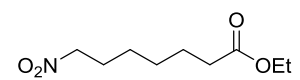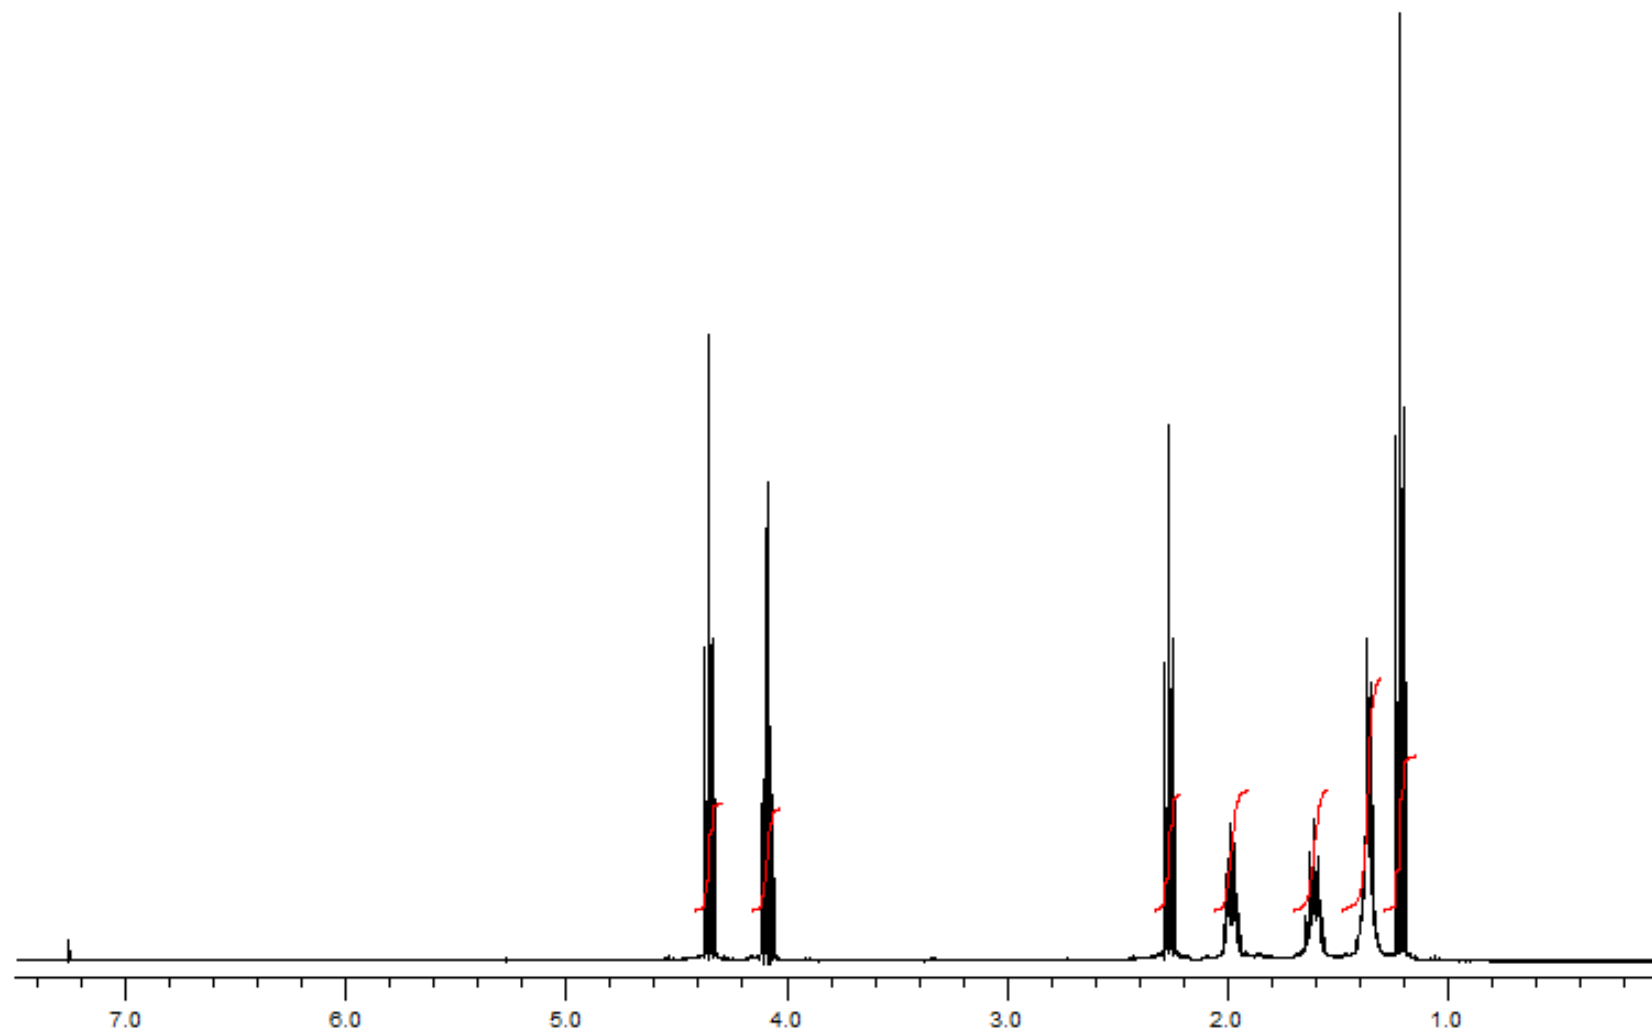

$^{13}\text{C}$ -NMR of compound **2i**

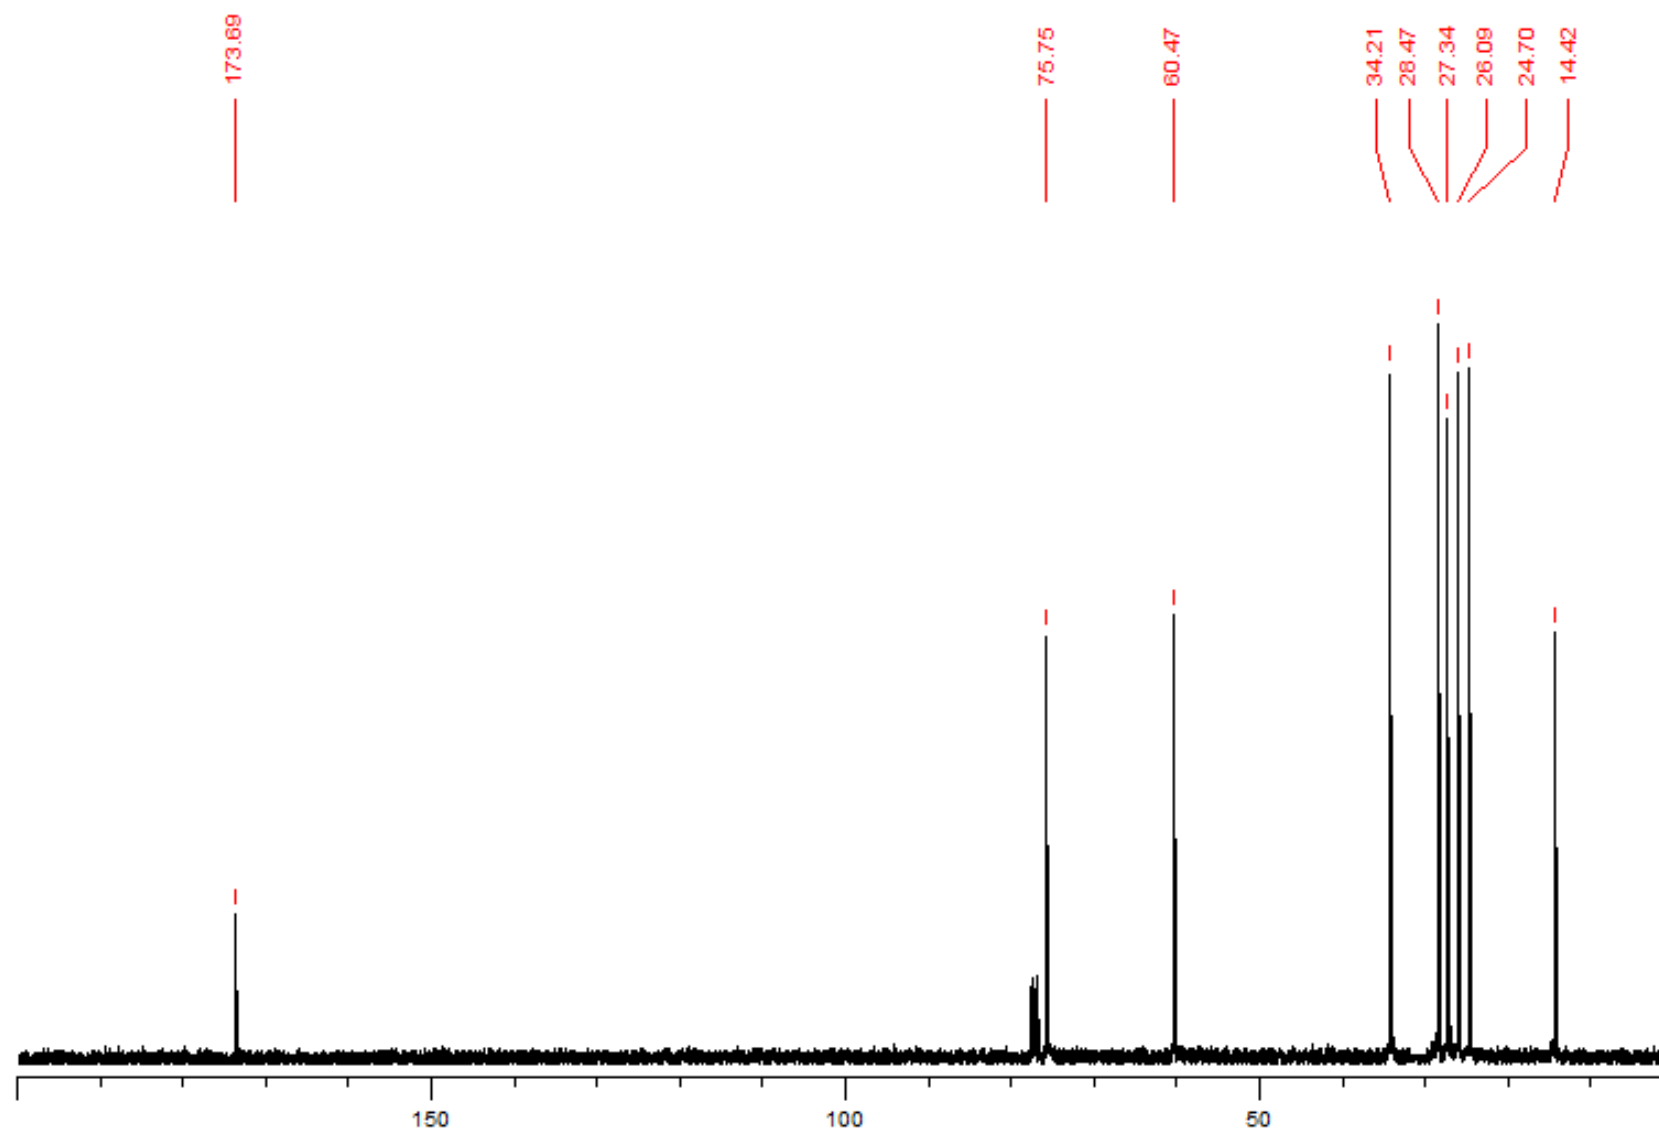

<sup>1</sup>H-NMR of compound **2j**

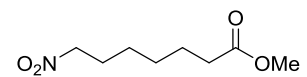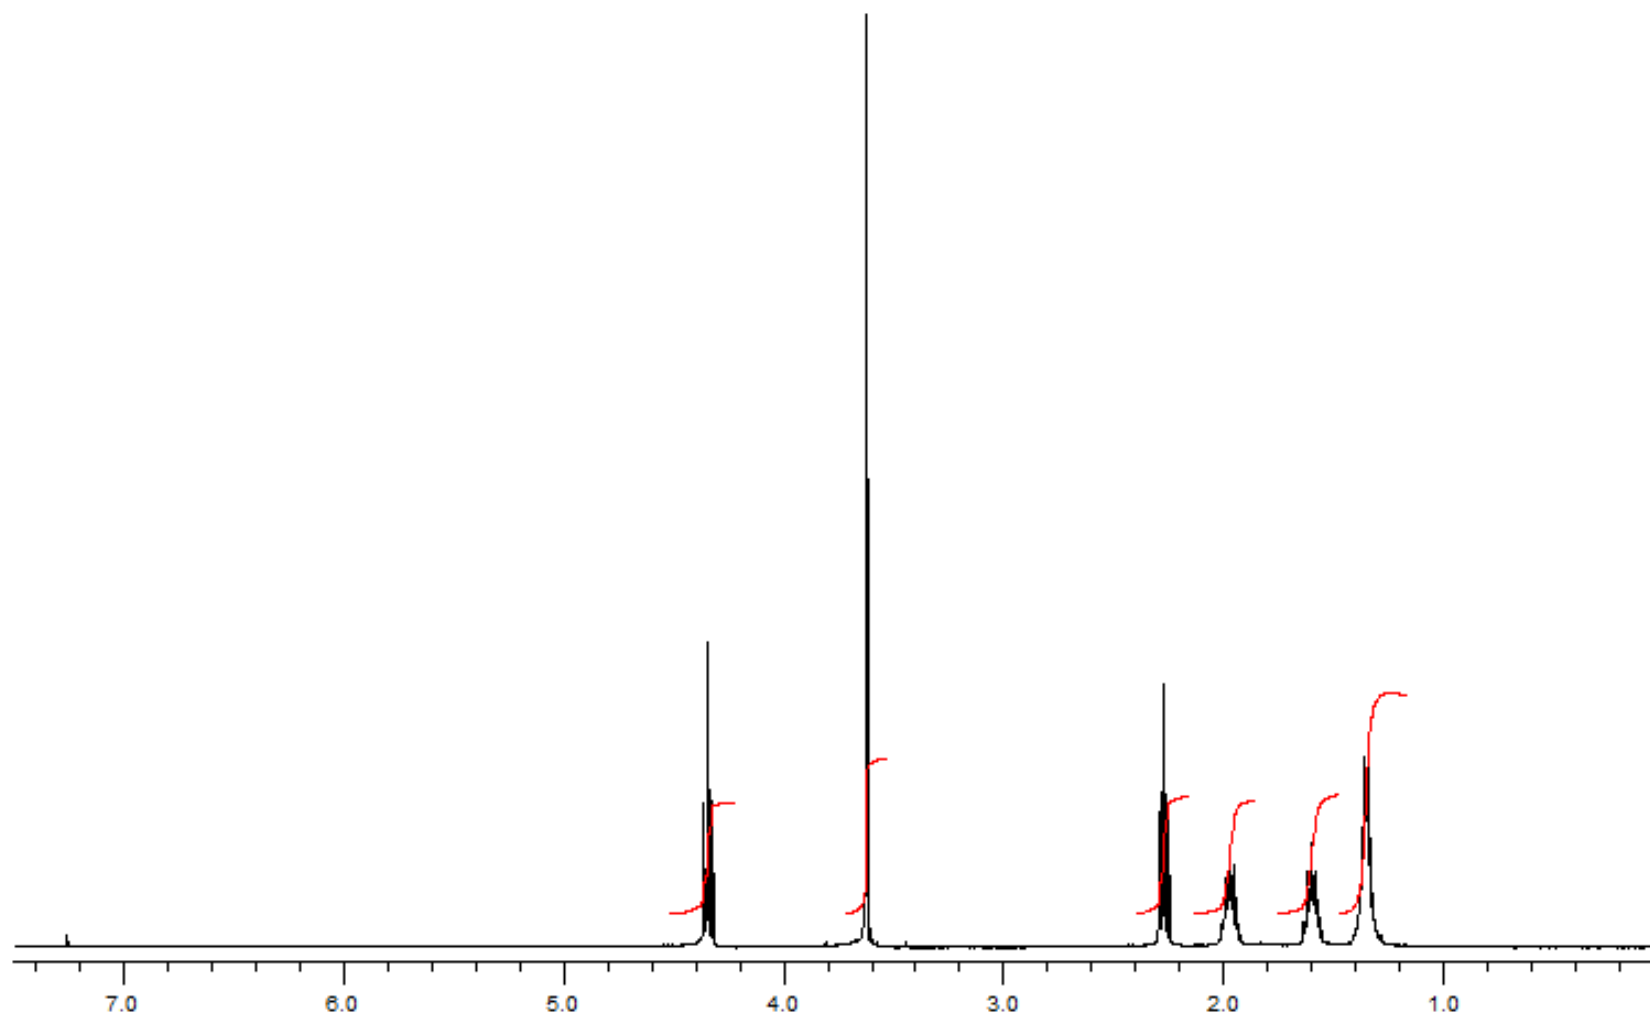

$^{13}\text{C}$ -NMR of compound **2j**

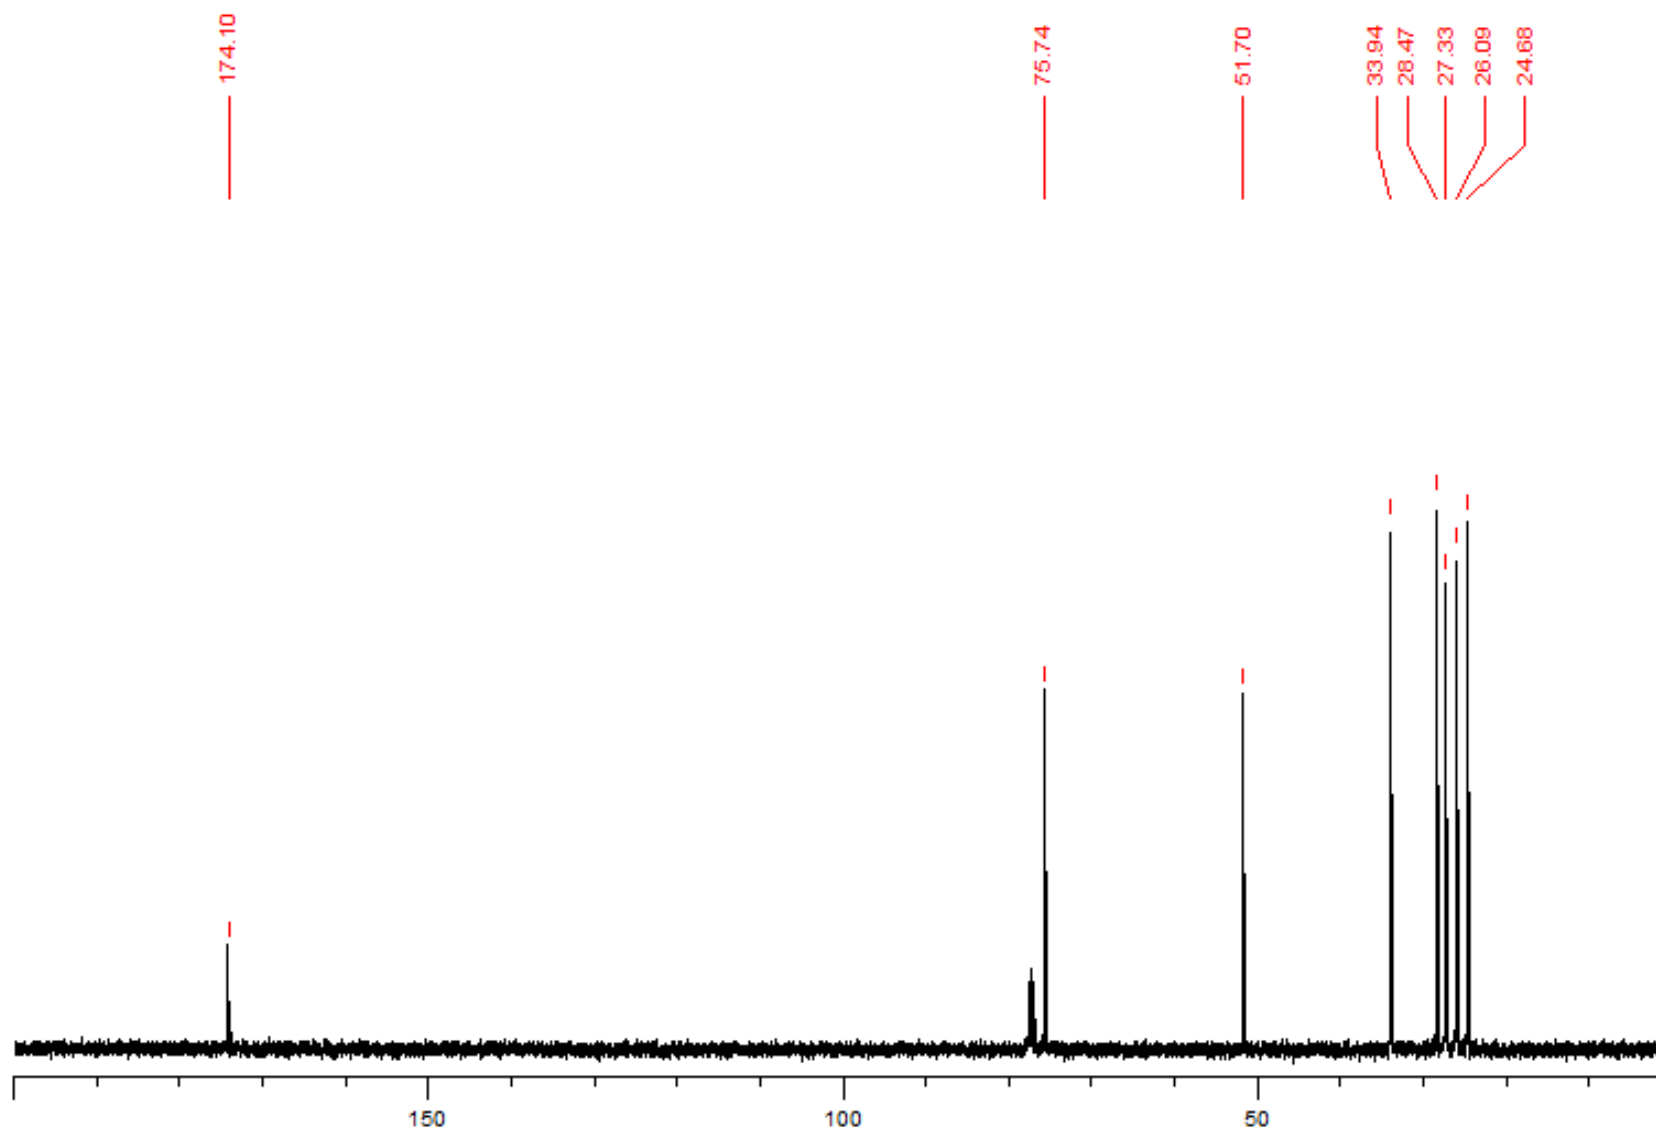

$^1\text{H}$ -NMR of compound **2k**

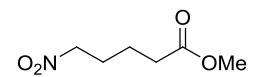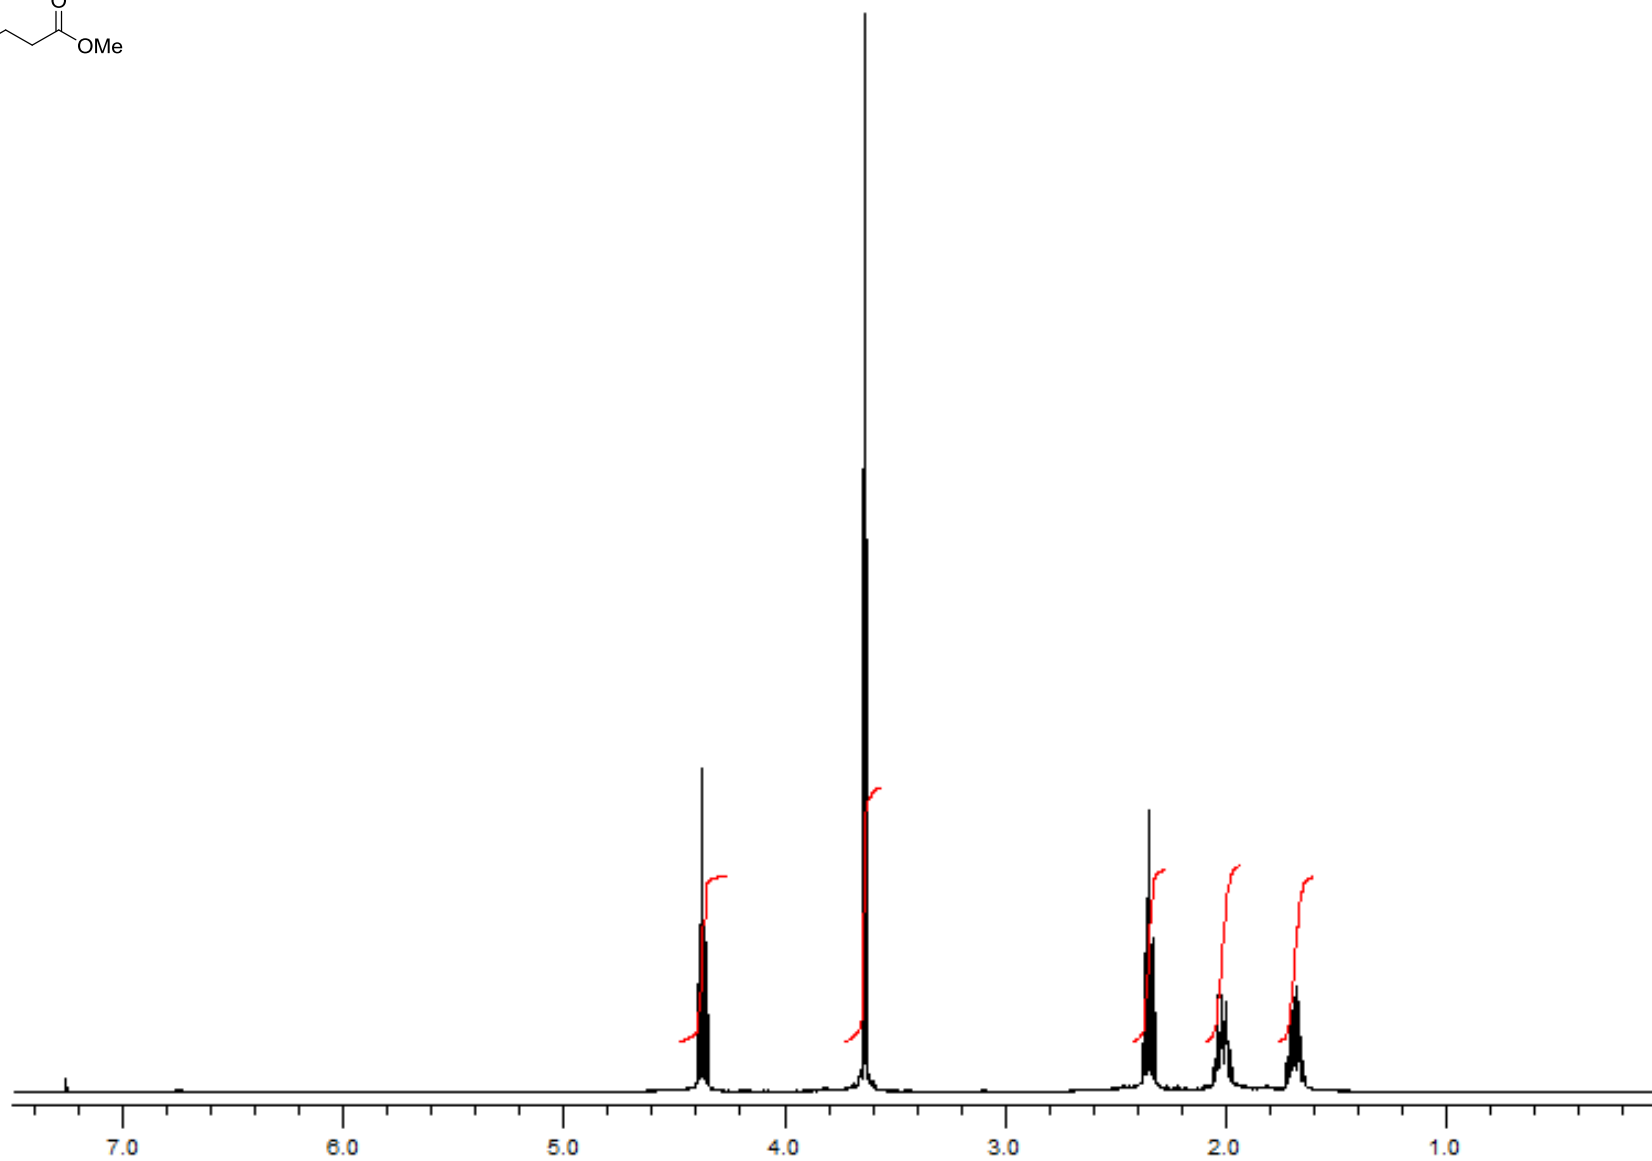

$^{13}\text{C}$ -NMR of compound **2k**

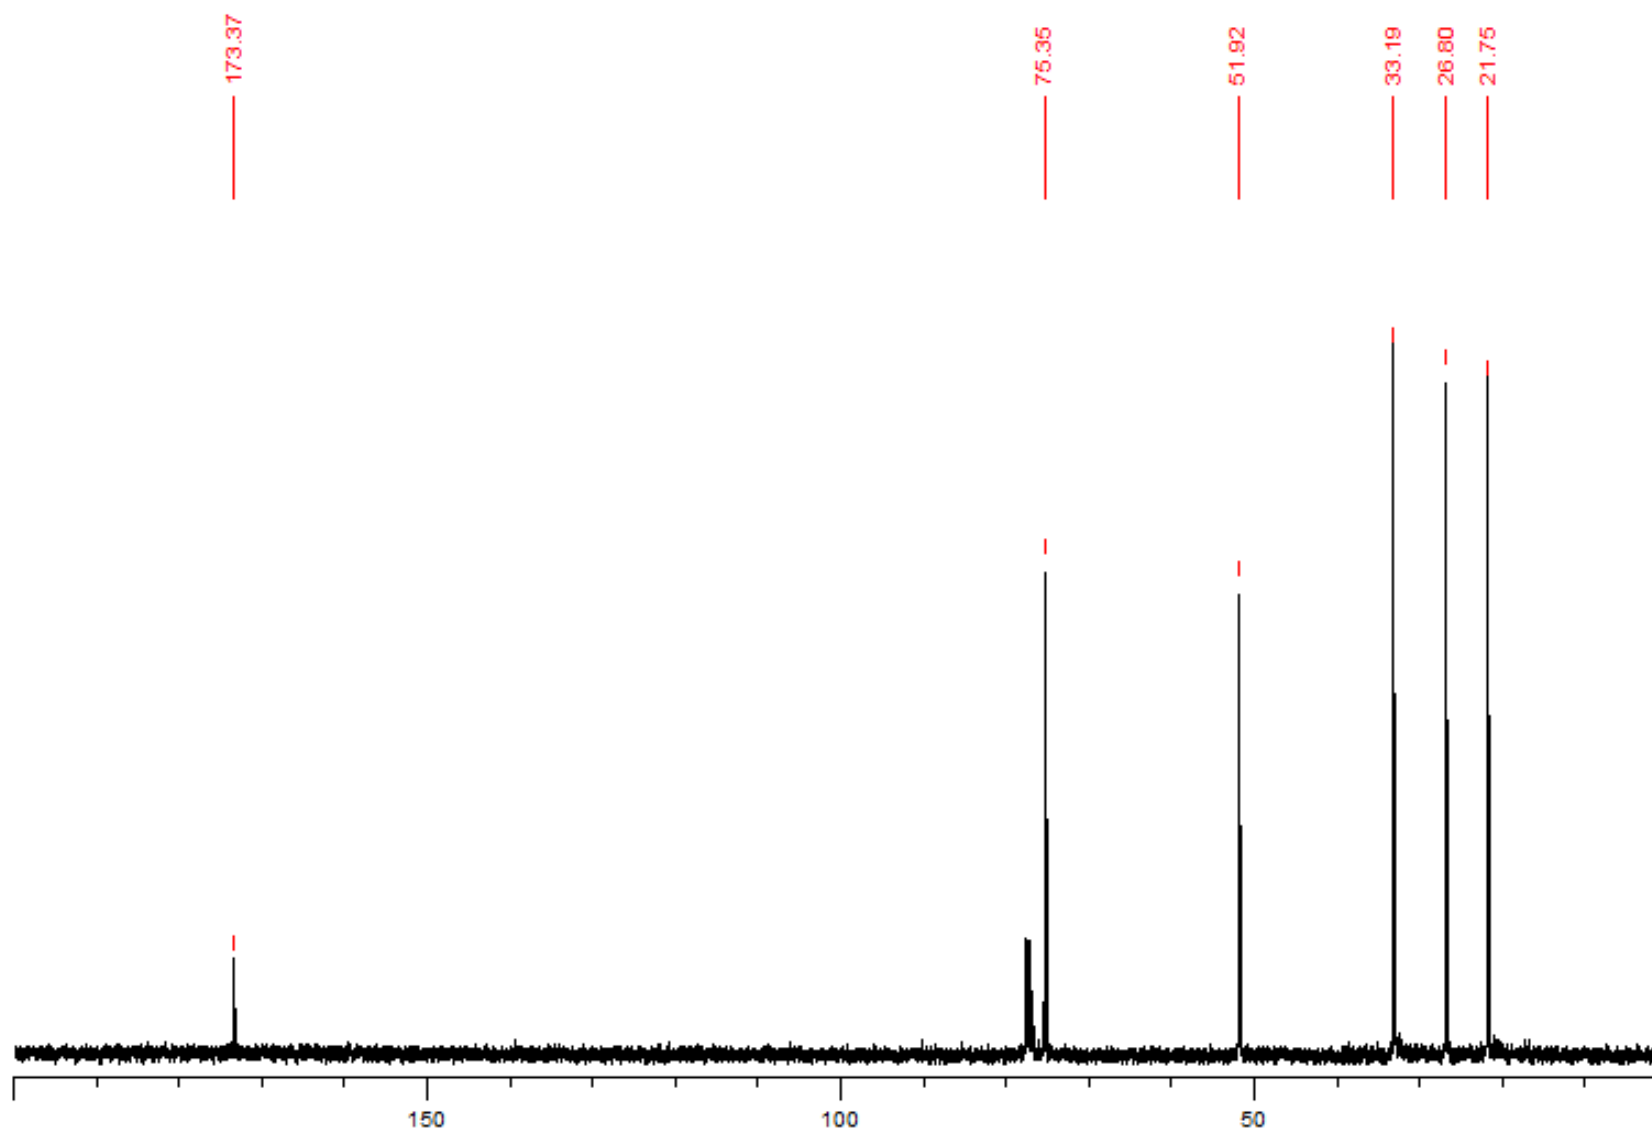

<sup>1</sup>H-NMR of compound **2I**

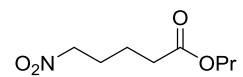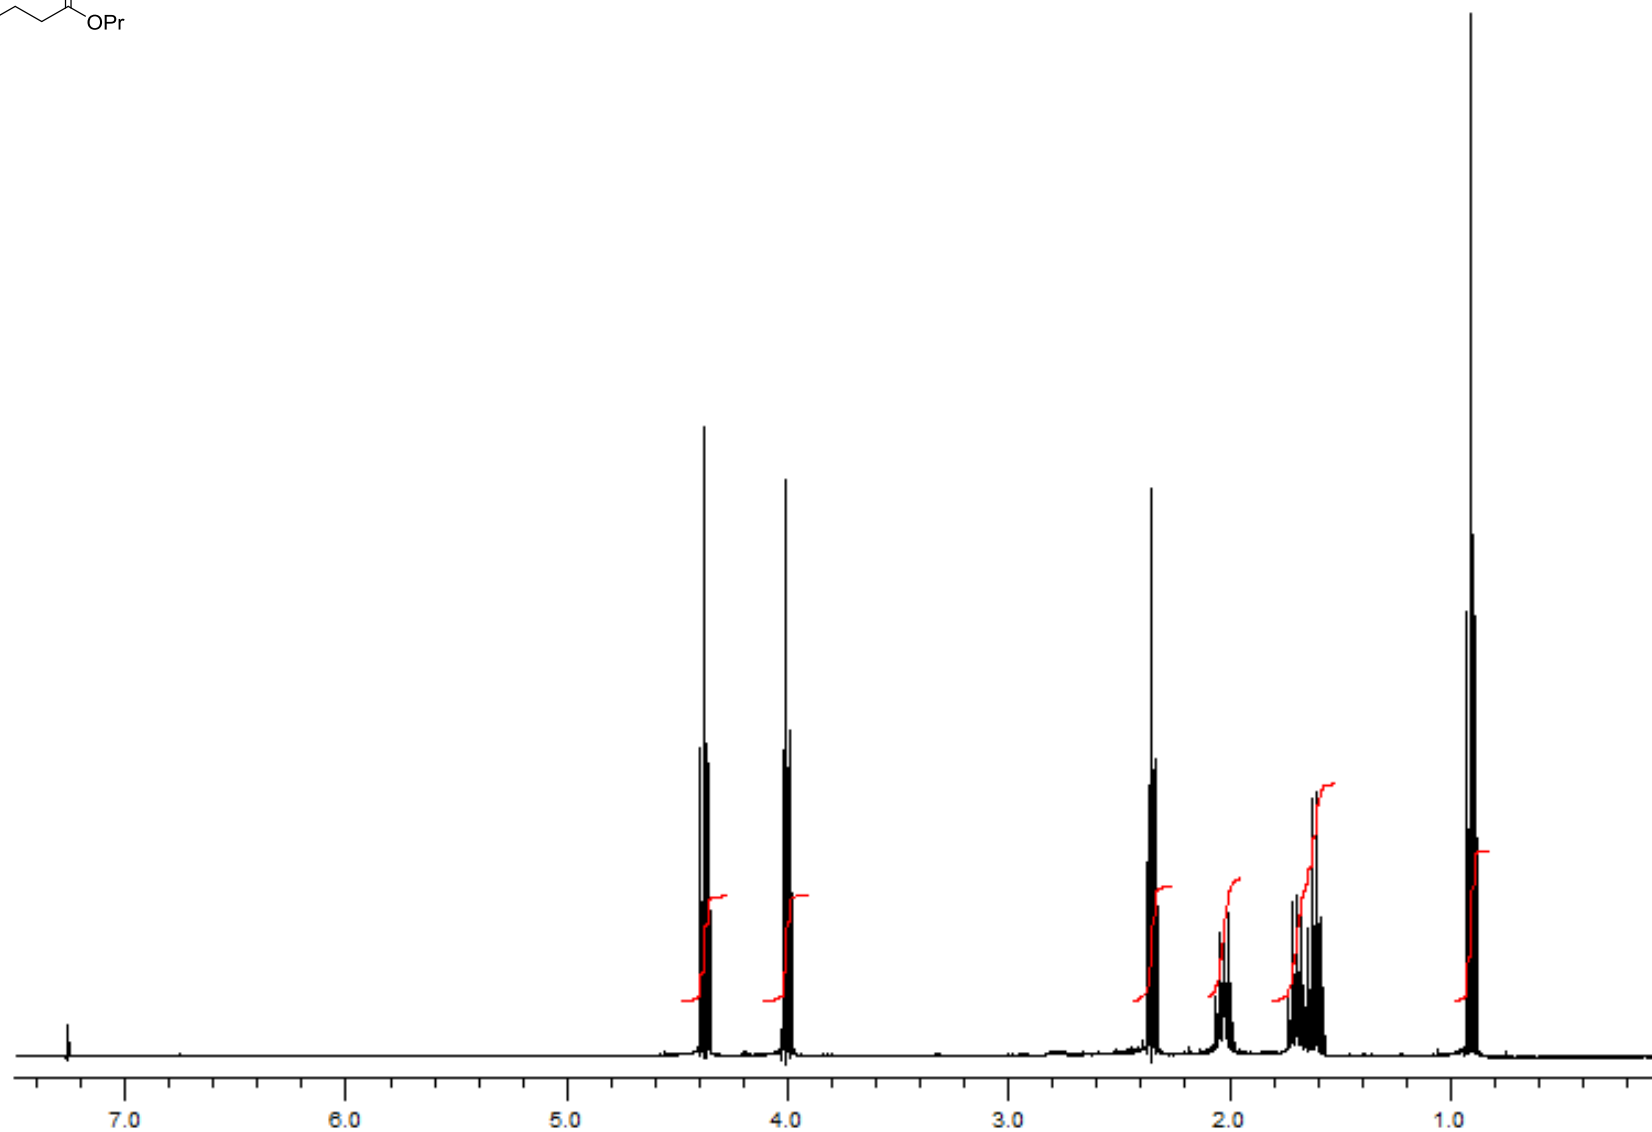

$^{13}\text{C}$ -NMR of compound **2l**

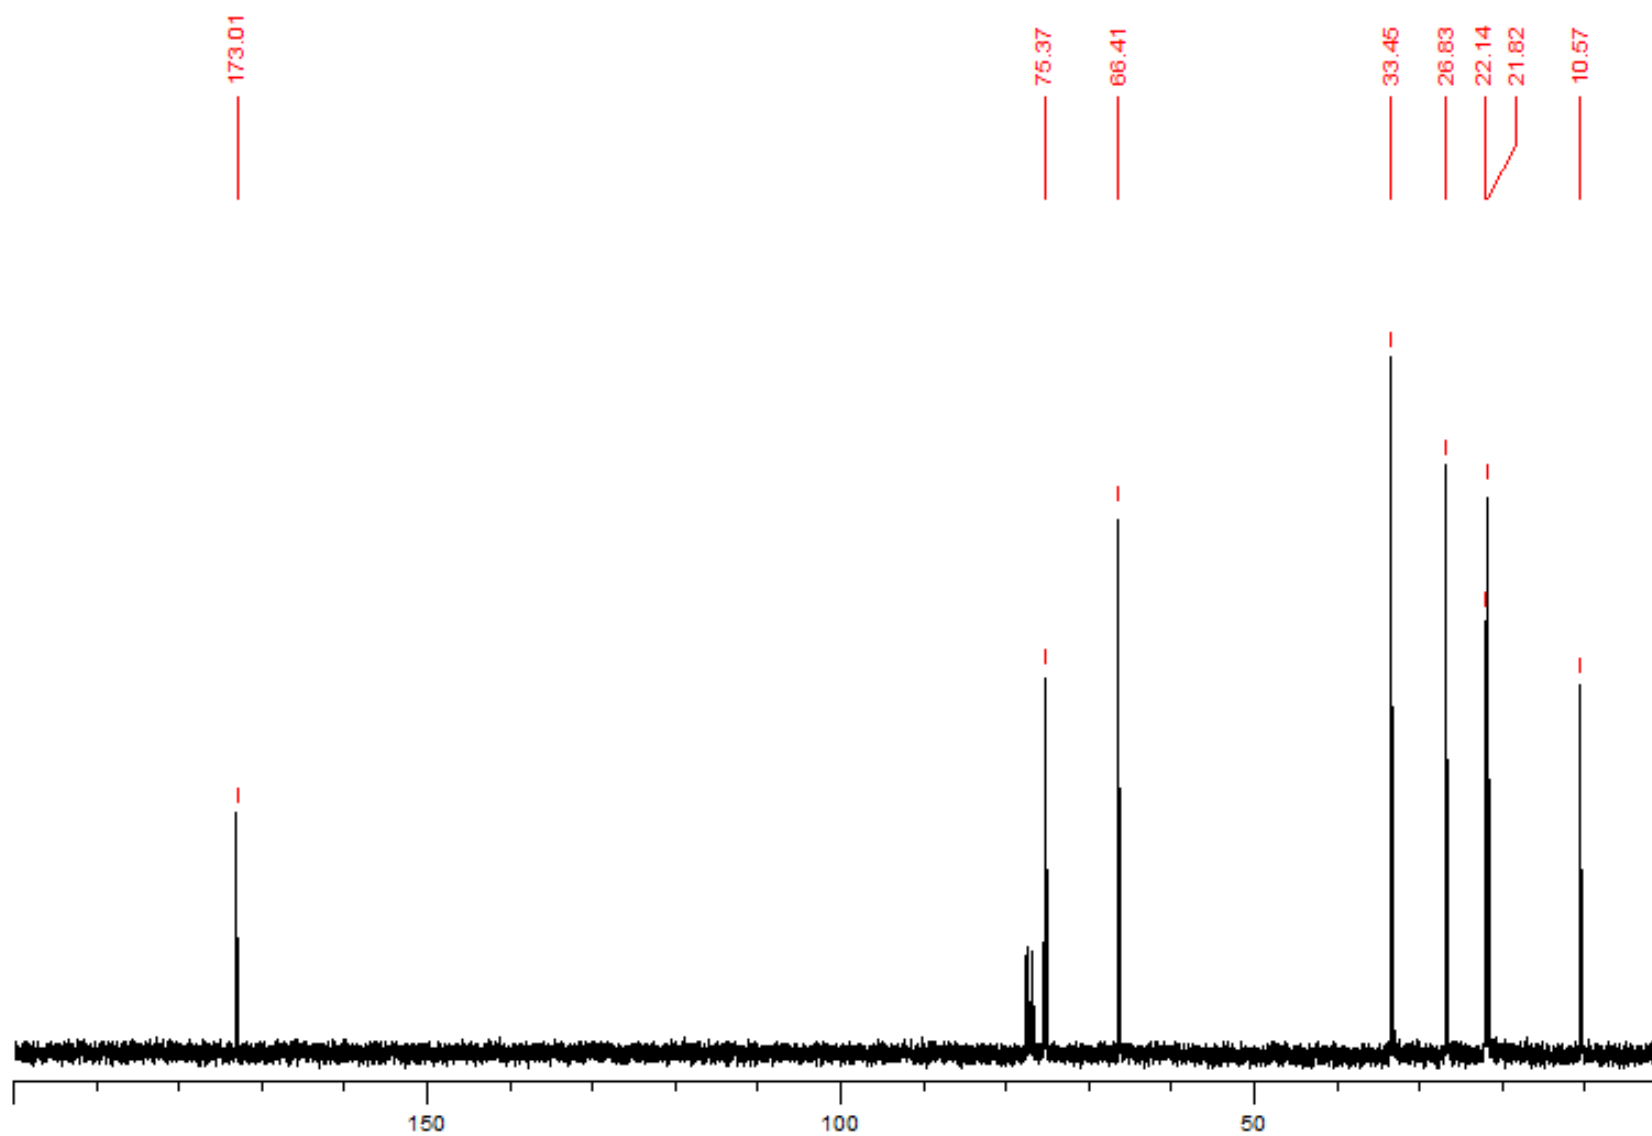

Supplement: c7gc02241g1.pdf [file c7gc02241g1.pdf]
