# Supplementary material for: A new, low impact and efficient synthesis of ω-nitro esters under solid heterogeneous catalysis
Source: Royal Society of Chemistry journal article supplement (doi:10.1039/c7gc02241g), 2017-01-01
Supplement: c7gc02241g2.pdf [file c7gc02241g2.pdf]

## Supporting Information

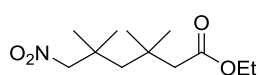

Compound **2a**. Clear oil. IR (neat)  $\nu$ : 1551, 1727  $\text{cm}^{-1}$ .  $^1\text{H-NMR}$  (400MHz,  $\text{CDCl}_3$ )  $\delta$ : 1.14 (s, 6H), 1.19 (s, 6H), 1.26 (t, 3H,  $J = 7.3$  Hz), 1.57 (s, 2H), 2.28 (s, 2H), 4.12 (q, 2H,  $J = 7.3$  Hz), 4.31 (s, 2H).  $^{13}\text{C-NMR}$  (400MHz,  $\text{CDCl}_3$ )  $\delta$ : 14.5, 27.2, 29.5, 34.9, 37.0,

48.5, 49.7, 60.4, 87.6, 172.0. MS-(EI)  $m/z$ : 199(2), 184(19), 111(18), 109(20), 97(13), 83(98), 69(100), 55(54), 41(61), 29(18). Anal. Calcd. for  $\text{C}_{12}\text{H}_{23}\text{NO}_4$  (245.32): C, 58.75; H, 9.45; N, 5.71; Found: C, 58.79; H, 9.42; N, 5.68.

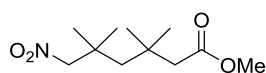

Compound **2b**. Clear oil. IR (neat)  $\nu$ : 1550, 1725  $\text{cm}^{-1}$ .  $^1\text{H-NMR}$  (400MHz,  $\text{CDCl}_3$ )  $\delta$ : 1.13 (s, 6H), 1.18 (s, 6H), 1.56 (s, 2H), 2.29 (s, 2H), 3.65 (s, 3H), 4.30 (s, 2H).  $^{13}\text{C-NMR}$  (400MHz,  $\text{CDCl}_3$ )  $\delta$ : 27.1, 29.5, 34.9, 37.0, 48.3, 49.7, 51.5, 87.6, 172.5. MS-(EI)  $m/z$ :

200(10), 115(24), 111(22), 97(42), 73(100), 69(41), 55(44), 41(25). Anal. Calcd. for  $\text{C}_{11}\text{H}_{21}\text{NO}_4$  (231.29): C, 57.12; H, 9.15; N, 6.06; Found: C, 57.08; H, 9.18; N, 6.02.

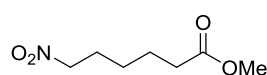

Compound **2c**. Clear oil. IR (neat)  $\nu$ : 1552, 1726  $\text{cm}^{-1}$ .  $^1\text{H-NMR}$  (400MHz,  $\text{CDCl}_3$ )  $\delta$ : 1.36-1.48 (m, 2H), 1.61-1.73 (m, 2H), 1.96-2.07 (m, 2H), 2.33 (t, 2H,  $J = 7.3$  Hz), 3.67 (s, 3H), 4.38 (t, 2H,  $J = 7.3$  Hz).  $^{13}\text{C-NMR}$  (400MHz,  $\text{CDCl}_3$ )  $\delta$ : 24.3, 26.0, 27.3, 33.8,

51.9, 75.6, 173.9. MS-(EI)  $m/z$ : 144(49), 97(32), 85(49), 74(31), 69(100), 59(41), 55(52), 41(61). Anal. Calcd. for  $\text{C}_7\text{H}_{13}\text{NO}_4$  (175.18): C, 47.99; H, 7.48; N, 8.00; Found: C, 47.96; H, 7.51; N, 7.97.

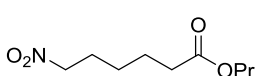

Compound **2d**. Clear oil. IR (neat)  $\nu$ : 1553, 1728  $\text{cm}^{-1}$ .  $^1\text{H-NMR}$  (400MHz,  $\text{CDCl}_3$ )  $\delta$ : 0.89 (t, 3H,  $J = 7.3$  Hz), 1.33-1.44 (m, 2H), 1.54-1.70 (m, 4H), 1.93-2.04 (m, 2H), 2.29 (t, 2H,  $J = 7.3$  Hz), 3.98 (t, 2H,  $J = 6.8$  Hz), 4.35 (t, 2H,  $J = 7.3$  Hz).  $^{13}\text{C-NMR}$  (400MHz,

$\text{CDCl}_3$ )  $\delta$ : 10.6, 22.2, 24.3, 25.9, 27.2, 34.0, 66.2, 75.6, 173.5. MS-(EI)  $m/z$ : 144(100), 115(17), 97(18), 69(60), 55(23), 41(41). Anal. Calcd. for  $\text{C}_9\text{H}_{17}\text{NO}_4$  (203.24): C, 53.19; H, 8.43; N, 6.89; Found: C, 53.23; H, 8.40; N, 6.92.

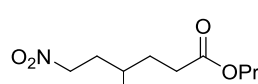

Compound **2e**. Clear oil. IR (neat)  $\nu$ : 1555, 1724  $\text{cm}^{-1}$ .  $^1\text{H-NMR}$  (400MHz,  $\text{CDCl}_3$ )  $\delta$ : 0.91 (t, 3H,  $J = 7.3$  Hz), 0.93 (d, 3H,  $J = 6.4$  Hz), 1.41-1.73 (m, 5H), 1.74-1.86 (m, 1H), 1.99-2.10 (m, 1H), 2.21-2.39 (m, 2H), 4.00 (t, 2H,  $J = 6.8$  Hz), 4.40 (t, 2H,  $J = 7.3$  Hz).

$^{13}\text{C-NMR}$  (400MHz,  $\text{CDCl}_3$ )  $\delta$ : 10.6, 18.9, 22.2, 30.1, 31.5, 31.9, 34.1, 66.3, 74.0, 173.6. MS-(EI)  $m/z$ : 158(100), 129(11), 111(20), 99(18), 83(51), 69(34), 55(63), 43(39), 41(42), 29(9). Anal. Calcd. for  $\text{C}_{10}\text{H}_{19}\text{NO}_4$  (217.27): C, 55.28; H, 8.82; N, 6.45; Found: C, 55.24; H, 8.79; N, 6.42.

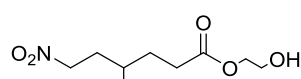

Compound **2f**. Clear oil. IR (neat)  $\nu$ : 1552, 1724, 3448  $\text{cm}^{-1}$ .  $^1\text{H-NMR}$  (400MHz,  $\text{CDCl}_3$ )  $\delta$ : 0.91 (d, 3H,  $J = 6.4$  Hz), 1.42-1.59 (m, 2H), 1.62-1.72 (m, 1H), 1.73-1.84 (m, 1H), 1.98-2.09 (m, 1H), 2.25-2.44 (m, 3H), 3.75-3.79 (m, 2H), 4.14-4.18 (m,

2H), 4.39 (t, 2H,  $J = 7.3$  Hz).  $^{13}\text{C-NMR}$  (400MHz,  $\text{CDCl}_3$ )  $\delta$ : 18.9, 30.1, 31.4, 31.7, 34.1, 61.2, 66.3, 74.0, 174.0. MS-(EI)  $m/z$ : 158(100), 111(29), 99(21), 83(87), 69(33), 55(98), 41(39), 29(19). Anal. Calcd. for  $\text{C}_9\text{H}_{17}\text{NO}_5$  (219.24): C, 49.31; H, 7.82; N, 6.39; Found: C, 49.35; H, 7.85; N, 6.37.

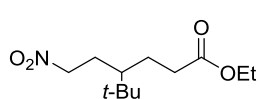

Compound **2g**. Clear oil. IR (neat)  $\nu$ : 1558, 1728  $\text{cm}^{-1}$ .  $^1\text{H-NMR}$  (400MHz,  $\text{CDCl}_3$ )  $\delta$ : 0.88 (s, 9H), 0.92-1.00 (m, 1H), 1.24 (t, 3H,  $J = 7.3$  Hz), 1.30-1.44 (m, 1H), 1.64-1.77 (m, 1H), 1.79-1.92 (m, 1H), 2.14-2.42 (m, 3H), 4.11 (q, 2H,  $J = 7.3$  Hz), 4.34-4.50 (m, 2H).  $^{13}\text{C-NMR}$  (400MHz,  $\text{CDCl}_3$ )  $\delta$ : 14.4, 26.2, 27.6, 29.3, 34.1, 34.2, 45.1, 60.7, 75.8, 173.6. MS-(EI)  $m/z$ : 200(50), 137(18), 113(40), 85(42), 57(100), 41(34). Anal. Calcd. for  $\text{C}_{12}\text{H}_{23}\text{NO}_4$  (245.32): C, 58.75; H, 9.45; N, 5.71; Found: C, 58.79; H, 9.42; N, 5.68.

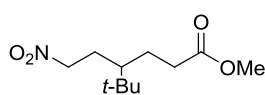

Compound **2h**. Clear oil. IR (neat)  $\nu$ : 1557, 1729  $\text{cm}^{-1}$ .  $^1\text{H-NMR}$  (400MHz,  $\text{CDCl}_3$ )  $\delta$ : 0.93 (s, 9H), 0.94-1.01 (m, 1H), 1.33-1.46 (m, 1H), 1.66-1.78 (m, 1H), 1.82-1.93 (m, 1H), 2.17-2.43 (m, 3H), 3.68 (s, 3H), 4.37-4.50 (m, 2H).  $^{13}\text{C-NMR}$  (400MHz,  $\text{CDCl}_3$ )  $\delta$ :

26.2, 27.6, 29.4, 34.0, 34.3, 45.2, 51.9, 75.8, 174.0. MS-(EI)  $m/z$ : 200(15), 137(14), 113(22), 85(50), 57(100), 41(38), 29(12). Anal. Calcd. for  $\text{C}_{11}\text{H}_{21}\text{NO}_4$  (231.29): C, 57.12; H, 9.15; N, 6.06; Found: C, 57.16; H, 9.12; N, 6.09.

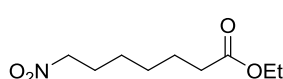

Compound **2i**. Clear oil. IR (neat)  $\nu$ : 1552, 1726  $\text{cm}^{-1}$ .  $^1\text{H-NMR}$  (400MHz,  $\text{CDCl}_3$ )  $\delta$ : 1.22 (t, 3H,  $J = 7.3$  Hz), 1.29-1.44 (m, 4H), 1.55-1.65 (m, 2H), 1.93-2.02 (m, 2H), 2.27 (t, 2H,  $J = 7.3$  Hz), 4.09 (q, 2H,  $J = 7.3$  Hz), 4.35 (t, 2H,  $J = 6.8$  Hz).  $^{13}\text{C-NMR}$

(400MHz,  $\text{CDCl}_3$ )  $\delta$ : 14.4, 24.7, 26.1, 27.4, 28.5, 34.2, 60.5, 75.8, 173.7. MS-(EI)  $m/z$ : 158(71), 111(30), 83(70), 69(34), 55(100), 41(52), 29(33). Anal. Calcd. for  $\text{C}_9\text{H}_{17}\text{NO}_4$  (203.24): C, 53.19; H, 8.43; N, 6.89; Found: C, 53.23; H, 8.40; N, 6.86.

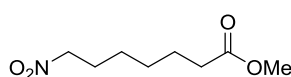

Compound **2j**. Clear oil. IR (neat)  $\nu$ : 1552, 1727  $\text{cm}^{-1}$ .  $^1\text{H-NMR}$  (400MHz,  $\text{CDCl}_3$ )  $\delta$ : 1.27-1.44 (m, 4H), 1.53-1.65 (m, 2H), 1.91-2.04 (m, 2H), 2.28 (t, 2H,  $J = 7.3$  Hz), 3.63 (s, 3H), 4.35 (t, 2H,  $J = 6.8$  Hz).  $^{13}\text{C-NMR}$  (400MHz,  $\text{CDCl}_3$ )  $\delta$ : 24.7, 26.1, 27.3,

28.5, 33.9, 51.7, 75.7, 174.1. MS-(EI)  $m/z$ : 158(41), 111(25), 99(22), 83(57), 74(56), 55(100), 41(72), 29 (19). Anal. Calcd. for  $\text{C}_8\text{H}_{15}\text{NO}_4$  (189.21): C, 50.78; H, 7.99; N, 7.40; Found: C, 50.82; H, 8.02; N, 7.37.

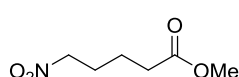

Compound **2k**. Clear oil. IR (neat)  $\nu$ : 1554, 1727  $\text{cm}^{-1}$ .  $^1\text{H-NMR}$  (400MHz,  $\text{CDCl}_3$ )  $\delta$ : 1.62-1.75 (m, 2H), 1.96-2.07 (m, 2H), 2.35 (t, 2H,  $J = 6.8$  Hz), 3.64 (s, 3H), 4.37 (t, 2H,  $J = 6.8$  Hz).  $^{13}\text{C-NMR}$  (400MHz,  $\text{CDCl}_3$ )  $\delta$ : 21.8, 26.8, 33.2, 51.9, 75.4, 173.4. MS-(EI)  $m/z$ :

130(27), 115(13), 102(13), 83(28), 73(45), 59(48), 55(100), 41(29), 29(19). Anal. Calcd. for  $\text{C}_6\text{H}_{11}\text{NO}_4$  (161.16): C, 44.72; H, 6.88; N, 8.69; Found: C, 44.76; H, 6.91; N, 8.66.

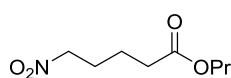

Compound **2l**. Clear oil. IR (neat)  $\nu$ : 1555, 1726  $\text{cm}^{-1}$ .  $^1\text{H-NMR}$  (400MHz,  $\text{CDCl}_3$ )  $\delta$ : 0.91 (t, 3H,  $J = 7.3$  Hz), 1.56-1.75 (m, 4H), 1.97-2.07 (m, 2H), 2.35 (t, 2H,  $J = 7.3$  Hz), 4.01 (t, 2H,  $J = 6.8$  Hz), 4.38 (t, 2H,  $J = 6.8$  Hz).  $^{13}\text{C-NMR}$  (400MHz,  $\text{CDCl}_3$ )  $\delta$ : 10.6, 21.8, 22.1,

26.8, 33.5, 66.4, 75.4, 173.0. MS-(EI)  $m/z$ : 130(100), 101(48), 83(24), 55(67), 41(35), 29(13). Anal. Calcd. for  $\text{C}_8\text{H}_{15}\text{NO}_4$  (189.21): C, 50.78; H, 7.99; N, 7.40 Found: C, 50.75; H, 7.96; N, 7.43.

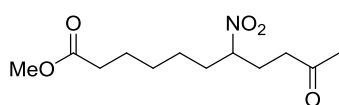

Compound **5a**. Clear oil. IR (neat)  $\nu$ : 1361, 1546, 1717, 1734  $\text{cm}^{-1}$ .  $^1\text{H-NMR}$  (400MHz,  $\text{CDCl}_3$ )  $\delta$ : 1.20-1.40 (m, 4H), 1.53-1.64 (m, 2H), 1.66-1.76 (m, 1H), 1.90-2.11 (m, 3H), 2.13 (s, 3H), 2.27 (t, 2H,  $J = 7.3$  Hz), 2.43-2.49 (m, 2H), 3.64

(s, 3H), 4.41-4.52 (m, 1H).  $^{13}\text{C-NMR}$  (400MHz,  $\text{CDCl}_3$ )  $\delta$ : 24.7, 25.6, 27.6, 28.6, 30.3, 33.9, 34.0, 39.2, 51.7, 88.0, 174.1, 206.7. MS-(EI)  $m/z$ : 181(10), 139(11), 121(12), 95(26), 43(100). Anal. Calcd. for  $\text{C}_{12}\text{H}_{21}\text{NO}_5$  (259.30): C, 55.58; H, 8.16; N, 5.40 Found: C, 55.62; H, 8.19; N, 5.38.

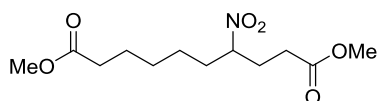

Compound **5b**. Clear oil. IR (neat)  $\nu$ : 1363, 1547, 1733  $\text{cm}^{-1}$ .  $^1\text{H-NMR}$  (400MHz,  $\text{CDCl}_3$ )  $\delta$ : 1.24-1.40 (m, 4H), 1.52-1.64 (m, 2H), 1.65-1.77 (m, 1H), 1.89-2.42 (m, 7H), 3.64 (s, 3H), 3.66 (s, 3H), 4.47-4.57 (m, 1H).  $^{13}\text{C-NMR}$  (400MHz,  $\text{CDCl}_3$ )  $\delta$ : 24.7, 25.6, 28.6, 28.8, 30.1, 33.8, 34.0, 51.7, 52.1, 87.9, 172.6, 174.1. MS-(EI)  $m/z$ :

197(35), 165(100), 137(74), 119(78), 95(71), 74(40), 55(94), 41(53), 29(17). Anal. Calcd. for  $\text{C}_{12}\text{H}_{21}\text{NO}_6$  (275.30): C, 52.35; H, 7.69; N, 5.09 Found: C, 52.38; H, 7.72; N, 5.12.

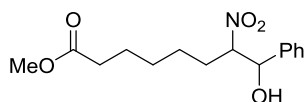

Compound **6a**. Clear oil. *Diastereomeric mixture* (8:2). IR (neat)  $\nu$ : 702, 1366, 1732, 3475  $\text{cm}^{-1}$ .  $^1\text{H-NMR}$  (400MHz,  $\text{CDCl}_3$ )  $\delta$ : 1.11-1.37 (m, 5H), 1.43-1.60 (m, 2H), 1.78-1.92 (m, 1H), 2.18-2.27 (m, 3H), 3.63 (s, 2.4H), 3.64 (s, 0.6H), 4.59-4.72

(m, 1H), 5.01 (d, 0.8H,  $J = 9.0$  Hz), 5.17 (d, 0.2H,  $J = 4.7$  Hz), 7.30-7.44 (m, 5H).  $^{13}\text{C-NMR}$  (400MHz,  $\text{CDCl}_3$ )  $\delta$ : 24.6, 24.7, 25.5, 25.7, 27.8, 28.4, 28.6, 30.4, 33.9, 34.0, 51.7, 74.6, 75.9, 93.3, 93.9, 126.4, 127.1, 128.9, 129.0, 129.3, 129.5, 138.8, 174.2. Anal. Calcd. for  $\text{C}_{15}\text{H}_{21}\text{NO}_5$  (295.34): C, 61.00; H, 7.17; N, 4.74 Found: C, 61.05; H, 7.21; N, 4.71.

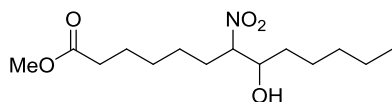

Compound **6b**. Clear oil. *Diastereomeric mixture* (1:1). IR (neat)  $\nu$ : 1363, 1547, 1736, 3474  $\text{cm}^{-1}$ .  $^1\text{H-NMR}$  (400MHz,  $\text{CDCl}_3$ )  $\delta$ : 0.82-0.92 (m, 3H), 1.19-1.67 (m, 12H), 1.55-1.66 (m, 2H), 1.70-1.86 (m, 1H), 1.95-2.23 (m, 2H), 2.29 (t, 2H,  $J = 7.3$  Hz), 3.65 (s, 3H), 3.80-3.89 (m, 0.5H), 3.96-4.02 (m, 0.5H), 4.37-4.47 (m, 1H).  $^{13}\text{C-NMR}$  (400MHz,  $\text{CDCl}_3$ )  $\delta$ : 14.2, 22.7, 24.7, 25.2, 25.5, 25.6, 25.9, 28.0, 28.6, 28.7, 30.4, 31.7, 31.8, 33.4, 33.8,

33.9, 34.0, 51.8, 72.3, 72.6, 92.4, 93.0, 174.2. Anal. Calcd. for  $\text{C}_{14}\text{H}_{27}\text{NO}_5$  (289.37): C, 58.11; H, 9.41; N, 4.84 Found: C, 58.15; H, 9.37; N, 4.87.
